1           **Differences between intrinsic and acquired nucleoside analogue**  
2                           **resistance in acute myeloid leukaemia cells**

3 Tamara Rothenburger<sup>1,2</sup>, Dominique Thomas<sup>3</sup>, Yannick Schreiber<sup>3</sup>, Paul R. Wratil<sup>4,5</sup>,  
4 Tamara Pflantz<sup>4,5</sup>, Kirsten Knecht<sup>6</sup>, Katie Digianantonio<sup>6</sup>, Joshua Temple<sup>6</sup>,  
5 Constanze Schneider<sup>7</sup>, Hanna-Mari Baldauf<sup>4</sup>, Katie-May McLaughlin<sup>8</sup>, Florian  
6 Rothweiler<sup>1</sup>, Berna Bilen<sup>2</sup>, Samira Farmand<sup>2</sup>, Denisa Bojkova<sup>1</sup>, Rui Costa<sup>1</sup>, Nerea  
7 Ferreirós<sup>3</sup>, Gerd Geisslinger<sup>3,9</sup>, Thomas Oellerich<sup>10,11,12</sup>, Yong Xiong<sup>6</sup>, Oliver T.  
8 Keppler<sup>4,5</sup>, Mark N. Wass<sup>8</sup>, Martin Michaelis<sup>8\*</sup>, Jindrich Cinatl jr.<sup>1\*</sup>

9   <sup>1</sup> Institute for Medical Virology, Goethe-University, Frankfurt am Main, Germany

10   <sup>2</sup> Faculty of Biological Sciences, Goethe-University, Frankfurt am Main, Germany

11   <sup>3</sup> pharmazentrum frankfurt/ZAFES, Institute of Clinical Pharmacology, Goethe  
12 University of Frankfurt, Frankfurt, Germany

13   <sup>4</sup> Max von Pettenkofer Institute & Gene Center, Virology, National Reference Center  
14 for Retroviruses, Faculty of Medicine, LMU München, Munich, Germany

15   <sup>5</sup> German Center for Infection Research (DZIF), Partner Site Munich, Germany

16   <sup>6</sup> Department of Molecular Biophysics and Biochemistry, Yale University, New  
17 Haven, CT, US

18   <sup>7</sup> Department of Pediatric Oncology, Dana-Farber Cancer Institute, Harvard Medical  
19 School, Boston, MA, USA

20   <sup>8</sup> School of Biosciences, University of Kent, Canterbury, UK

21   <sup>9</sup> Fraunhofer Institute for Molecular Biology and Applied Ecology (IME), Project group  
22 Translational Medicine and Pharmacology (TMP), Frankfurt am Main, Germany

23   <sup>10</sup> Department of Hematology/Oncology, Goethe-University, Frankfurt am Main,  
24 Germany

25   <sup>11</sup> Molecular Diagnostics Unit, Frankfurt Cancer Institute, Frankfurt am Main,  
26 Germany

27 <sup>12</sup> German Cancer Consortium/German Cancer Research Center, Heidelberg,  
28 Germany

29

30 \* correspondence: [Cinatl@em.uni-frankfurt.de](mailto:Cinatl@em.uni-frankfurt.de) (J.C.jr.), [M.Michaelis@kent.ac.uk](mailto:M.Michaelis@kent.ac.uk)  
31 (M.M.)

32

33

## 34 **Summary**

35 **Background:** SAMHD1 mediates resistance to anti-cancer nucleoside analogues,  
36 including cytarabine, decitabine, and nelarabine that are commonly used for the  
37 treatment of leukaemia, through cleavage of their triphosphorylated forms. Hence,  
38 SAMHD1 inhibitors are promising candidates for the sensitisation of leukaemia cells  
39 to nucleoside analogue-based therapy. Here, we investigated the effects of the  
40 cytosine analogue CNDAC, which has been proposed to be a SAMHD1 substrate, in  
41 the context of SAMHD1.

42 **Methods:** CNDAC was tested in 13 acute myeloid leukaemia (AML cell lines), in 26  
43 acute lymphoblastic leukaemia cell lines, ten AML sublines adapted to various  
44 antileukaemic drugs, 24 single cell-derived clonal AML sublines, and primary  
45 leukaemic blasts from 24 AML patients. Moreover, 24 CNDAC-resistant sublines of  
46 the AML cell lines HL-60 and PL-21 were established. The *SAMHD1* gene was  
47 disrupted using CRISPR/Cas9 and SAMHD1 depleted using RNAi, and the viral Vpx  
48 protein. Forced DCK expression was achieved by lentiviral transduction. SAMHD1  
49 promoter methylation was determined by PCR after treatment of genomic DNA with  
50 the methylation-sensitive HpaII endonuclease. Nucleoside (analogue) triphosphate  
51 levels were determined by LC-MS/MS. CNDAC interaction with SAMHD1 was  
52 analysed by an enzymatic assay and by crystallisation.

53 **Results:** Although the cytosine analogue CNDAC was anticipated to inhibit  
54 SAMHD1, SAMHD1 mediated intrinsic CNDAC resistance in leukaemia cells.  
55 Accordingly, SAMHD1 depletion increased CNDAC triphosphate (CNDAC-TP) levels  
56 and CNDAC toxicity. Enzymatic assays and crystallisation studies confirmed  
57 CNDAC-TP to be a SAMHD1 substrate. In 24 CNDAC-adapted acute myeloid  
58 leukaemia (AML) sublines, resistance was driven by DCK (catalyses initial nucleoside  
59 phosphorylation) loss. CNDAC-adapted sublines displayed cross-resistance only to

60 other DCK substrates (e.g. cytarabine, decitabine). Cell lines adapted to drugs not  
61 affected by DCK or SAMHD1 remained CNDAC sensitive. In cytarabine-adapted  
62 AML cells, increased SAMHD1 and reduced DCK levels contributed to cytarabine  
63 and CNDAC resistance. **Conclusion:** Intrinsic and acquired resistance to CNDAC  
64 and related nucleoside analogues are driven by different mechanisms. The lack of  
65 cross-resistance between SAMHD1/ DCK substrates and non-substrates provides  
66 scope for next-line therapies after treatment failure.

67

68 **Key words:** leukemia, acute myeloid leukemia, acute lymphoblastic leukemia,  
69 CNDAC, sapacitabine, SAMHD1, CDK, intrinsic resistance, acquired resistance

70

## 71 **Introduction**

72 Drug resistance is a main obstacle in the successful treatment of cancer  
73 [Fenton et al., 2018; Michaelis et al., 2019; Bukowski et al., 2020]. Resistance can be  
74 either intrinsic or acquired. Intrinsic resistance means that a therapy-naïve cancer  
75 does not respond to treatment right from the start. In acquired resistance, there is an  
76 initial therapy response, but resistance develops over time [Michaelis et al., 2019;  
77 Santoni-Rugiu et al., 2019].

78 Intrinsic and acquired resistance are conceptually different. Intrinsic resistance  
79 is a collateral event during carcinogenesis not influenced by treatment. In contrast,  
80 acquired resistance is the consequence of a directed evolution driven by therapy. In  
81 agreement, discrepancies have been detected between drug resistance mechanisms  
82 in the intrinsic and the acquired resistance setting [Michaelis et al., 2019; Oellerich et  
83 al., 2019; Santoni-Rugiu et al., 2019; Touat et al., 2020].

84 Sterile alpha motif and histidine-aspartate domain-containing protein 1  
85 (SAMHD1) is a deoxynucleoside triphosphate (dNTP) triphosphohydrolase that  
86 cleaves physiological dNTPs into deoxyribonucleotides and inorganic triphosphate  
87 [Goldstone et al., 2011; Powell et al., 2011]. SAMHD1 also inactivates the  
88 triphosphorylated forms of some anti-cancer nucleoside analogues [Schneider et al.,  
89 2017; Herold et al., 2017; Knecht et al., 2018; Oellerich et al., 2019; Rothenburger et  
90 al., 2020; Xagoraris et al., 2021]. High SAMHD1 levels indicate poor clinical response  
91 to nucleoside analogues such as cytarabine, decitabine, and nelarabine in acute  
92 myeloid leukaemia (AML), acute lymphoblastic leukaemia, and Hodgkin lymphoma  
93 [Schneider et al., 2017; Oellerich et al., 2019; Rothenburger et al., 2020; Xagoraris et  
94 al., 2021]. Moreover, previous findings indicated differing roles of SAMHD1 in intrinsic  
95 and acquired resistance to nucleoside analogues [Schneider et al., 2017; Oellerich et  
96 al., 2019].

97           Here, we investigated intrinsic and acquired resistance against the nucleoside  
98 analogue 2'-C-cyano-2'-deoxy-1- $\beta$ -*D*-arabino-pentofuranosyl-cytosine (CNDAC).  
99 CNDAC and its orally available prodrug sapacitabine display clinical activity against  
100 AML [Kantarjian et al., 2010; Kantarjian et al., 2012; Czmerska et al., 2018;  
101 Kantarjian et al., 2019]. We selected CNDAC, because, in contrast to SAMHD1  
102 substrates such as cytarabine and decitabine, it has been proposed to be a SAMHD1  
103 inhibitor [Hollenbaugh et al., 2017]. CNDAC is further interesting due to its unique  
104 mechanism of action among deoxycytidine analogues, which is characterised by  
105 CNDAC triphosphate (CNDAC-TP) incorporation into DNA initially causing single  
106 strand breaks and G2 cell cycle arrest [Hanaoka et al., 1999; Azuma et al., 2001; Liu  
107 et al., 2005; Liu et al., 2008; Al Abo et al., 2017; Liu et al., 2018; Liu et al., 2019].

108

109

110

## 111 **Results**

### 112 ***SAMHD1 levels correlate with leukaemia cell sensitivity to CNDAC***

113           Initially, we characterised a panel of 13 human AML cell lines for the levels of  
114 SAMHD1 and deoxycytidine kinase (DCK) (Figure 1A). DCK phosphorylates and  
115 activates cytidine analogues in a rate-limiting step [Lotfi et al., 2003; Homminga et al.,  
116 2011; Wu et al., 2021] and may, hence, determine cell sensitivity to a nucleoside  
117 analogue like CNDAC anticipated to be a SAMHD1 inhibitor [Hollenbaugh et al.,  
118 2017]. We detected varying SAMHD1 and DCK levels (Figure 1A, Suppl. Figure 1),  
119 varying CNDAC concentrations that reduced cell viability by 50% (IC<sub>50</sub>) (Figure 1B,  
120 Suppl. Figure 2, Suppl. Table 1), and varying CNDAC-TP levels (Figure 1C) across  
121 the investigated cell lines. However, the CNDAC IC<sub>50</sub>s did not correlate with the  
122 cellular levels of DCK (Figure 1D), indicating that DCK is not a critical determinant of  
123 CNDAC activity in our cell line panel.

124           In contrast, the CNDAC IC<sub>50</sub>s correlated with the cellular SAMHD1 levels  
125 (Figure 1E), suggesting that SAMHD1 may cleave and inactivate CNDAC-TP,  
126 although CNDAC had been proposed to be a SAMHD1 inhibitor [Hollenbaugh et al.,  
127 2017]. Also, there was no correlation between cellular CNDAC-TP and DCK levels  
128 (Figure 1F), but an inverse correlation of the CNDAC-TP levels with SAMHD1 (Figure  
129 1G). This further supports the notion that SAMHD1 but not DCK critically determines  
130 CNDAC phosphorylation and activity. Notably, SAMHD1 promoter methylation  
131 (Figure 1H) did not always indicate cellular SAMHD1 levels (Figure 1A), showing that  
132 multiple mechanisms are involved in regulating the cellular abundance of this protein.

133           The CNDAC IC<sub>50</sub>s also correlated with the cellular SAMHD1 levels in acute  
134 lymphoblastic leukaemia (ALL) cells (Figure 1I, Suppl. Table 2). In agreement with  
135 previous findings [Rothenburger et al. 2020], T-cell ALL (T-ALL) cells were  
136 characterised by lower SAMHD1 levels than B-ALL cells (Figure 1J). This was

137 reflected by higher CNDAC sensitivity (Figure 1K) and higher CNDAC-TP levels  
 138 (Figure 1L) in T-ALL cells than in B-ALL cells. Taken together, these findings suggest  
 139 that CNDAC is a SAMHD1 substrate and that SAMHD1 but not DCK critically  
 140 determines CNDAC phosphorylation and activity in AML and ALL cells.  
 141

**Figure 1**

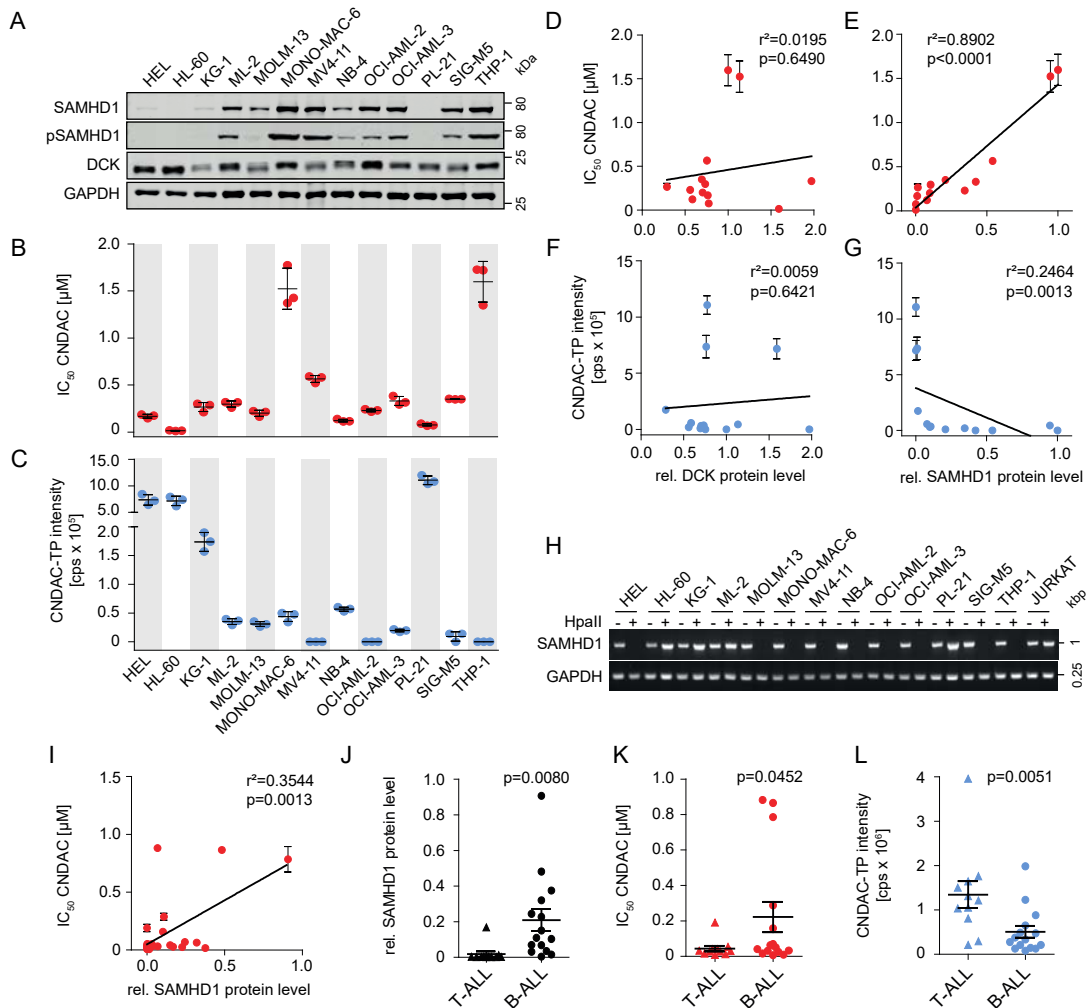

142

143 **Figure 1. SAMHD1 (but not DCK) levels determine sensitivity to CNDAC and**  
 144 **inversely correlate with CNDAC-triphosphate (CNDAC-TP) in leukaemia cell**  
 145 **lines.** (A) Representative Western blots of SAMHD1, phosphorylated SAMHD1  
 146 (pSAMHD1), and DCK in 13 AML cell lines. GAPDH served as loading control.  
 147 Uncropped Western blots are presented in Supplementary Figure 1. (B) CNDAC



148 concentrations that reduce the viability of AML cell lines by 50% ( $IC_{50}$ ). Horizontal  
149 lines and error bars represent means  $\pm$  SD of three independent experiments. (C,D)  
150 Correlation of the CNDAC  $IC_{50}$  values with cellular DCK (C) or SAMHD1 (D) protein  
151 levels, quantified using near-infrared Western blot images to determine the ratio  
152 DCK/ GAPDH or SAMHD1/ GAPDH. Closed circles and error bars represent means  
153  $\pm$  SD of three independent experiments. Linear regression analyses were performed  
154 using GraphPad Prism. (E) CNDAC triphosphate (CNDAC-TP) levels determined by  
155 LC-MS/MS. Horizontal lines and error bars show means  $\pm$  SD of three independent  
156 experiments. (F,G) Correlation of CNDAC-TP levels with cellular DCK (F) or  
157 SAMHD1 (G) protein levels in AML cell lines, quantified using near-infrared Western  
158 blot images to determine the ratio DCK/ GAPDH or SAMHD1/ GAPDH. Closed  
159 circles and error bars represent means  $\pm$  SD of three independent experiments.  
160 Linear regression analyses were performed using GraphPad Prism. (H) Analysis of  
161 *SAMHD1* promoter methylation in AML cell lines through amplification of a single  
162 PCR product (993-bp) corresponding to the promoter sequence after *HpaII* digestion.  
163 A 0.25-kb fragment of the GAPDH gene lacking *HpaII* sites was PCR-amplified using  
164 the same template DNA served as loading control. THP-1 served as control cell for  
165 an unmethylated *SAMHD1* promotor, while JURKAT served as control cell for a  
166 methylated promotor. (I) Correlation of CNDAC  $IC_{50}$  values in 26 ALL cell lines (11 T-  
167 ALL, 15 B-ALL) with SAMHD1 protein levels, quantified using near-infrared Western  
168 blot images to determine the ratio SAMHD1/ GAPDH relative to the positive control  
169 THP-1. Closed circles and error bars represent means  $\pm$  SD of three independent  
170 experiments. Linear regression analyses were performed using GraphPad Prism. (J-  
171 L) Comparison of SAMHD1 protein levels (J), CNDAC  $IC_{50}$  values (K) and CNDAC-  
172 TP levels determined by LC-MS/MS (L) in T-ALL and B-ALL cells. Each point  
173 represents the mean of three independent experiments. One-tailed Student's t-tests

174 were used to compare means in T-ALL and B-ALL cells (represented as horizontal  
175 lines  $\pm$  SEM).

176

### 177 ***SAMHD1* suppression sensitises leukaemia cells to CNDAC**

178 Functional studies further confirmed the impact of SAMHD1 on CNDAC  
179 activity. THP-1 AML cells, in which the *SAMHD1* gene was disrupted using  
180 CRISPR/Cas9 (THP-1 KO cells), displayed increased CNDAC sensitivity (Figure 2A)  
181 and CNDAC-TP levels (Figure 2B) relative to control cells. Moreover, THP-1 KO cells  
182 showed enhanced DNA damage, as indicated by  $\gamma$ H2AX levels, CHK2  
183 phosphorylation, and TIF1 $\beta$  phosphorylation (Figure 2C), and apoptosis, as indicated  
184 by PARP cleavage (Figure 2C) and caspase 3/7 activity (Figure 2D, Suppl. Table 3),  
185 in response to CNDAC. This is in line with the anticipated mechanism of action of  
186 CNDAC, i.e. CNDAC-TP incorporation into DNA resulting in strand breaks and  
187 apoptosis [Hanaoka et al., 1999; Azuma et al., 2001; Liu et al., 2005; Liu et al., 2008;  
188 Al Abo et al., 2017; Liu et al., 2018; Liu et al., 2019].

189 Further, SAMHD1 depletion using siRNA (Figure 2E, Suppl. Figure 3) and  
190 virus-like particles (VLPs) carrying the lentiviral VPX protein (VPX-VLPs) [Schneider  
191 et al., 2017] (Figure 2F) increased the CNDAC sensitivity of AML cell lines. VPX-  
192 VLP-mediated SAMHD1 depletion was also associated with elevated CNDAC-TP  
193 levels (Figure 2G). These findings further support a critical role of SAMHD1 in  
194 determining CNDAC sensitivity of AML cells.

195

**Figure 2**

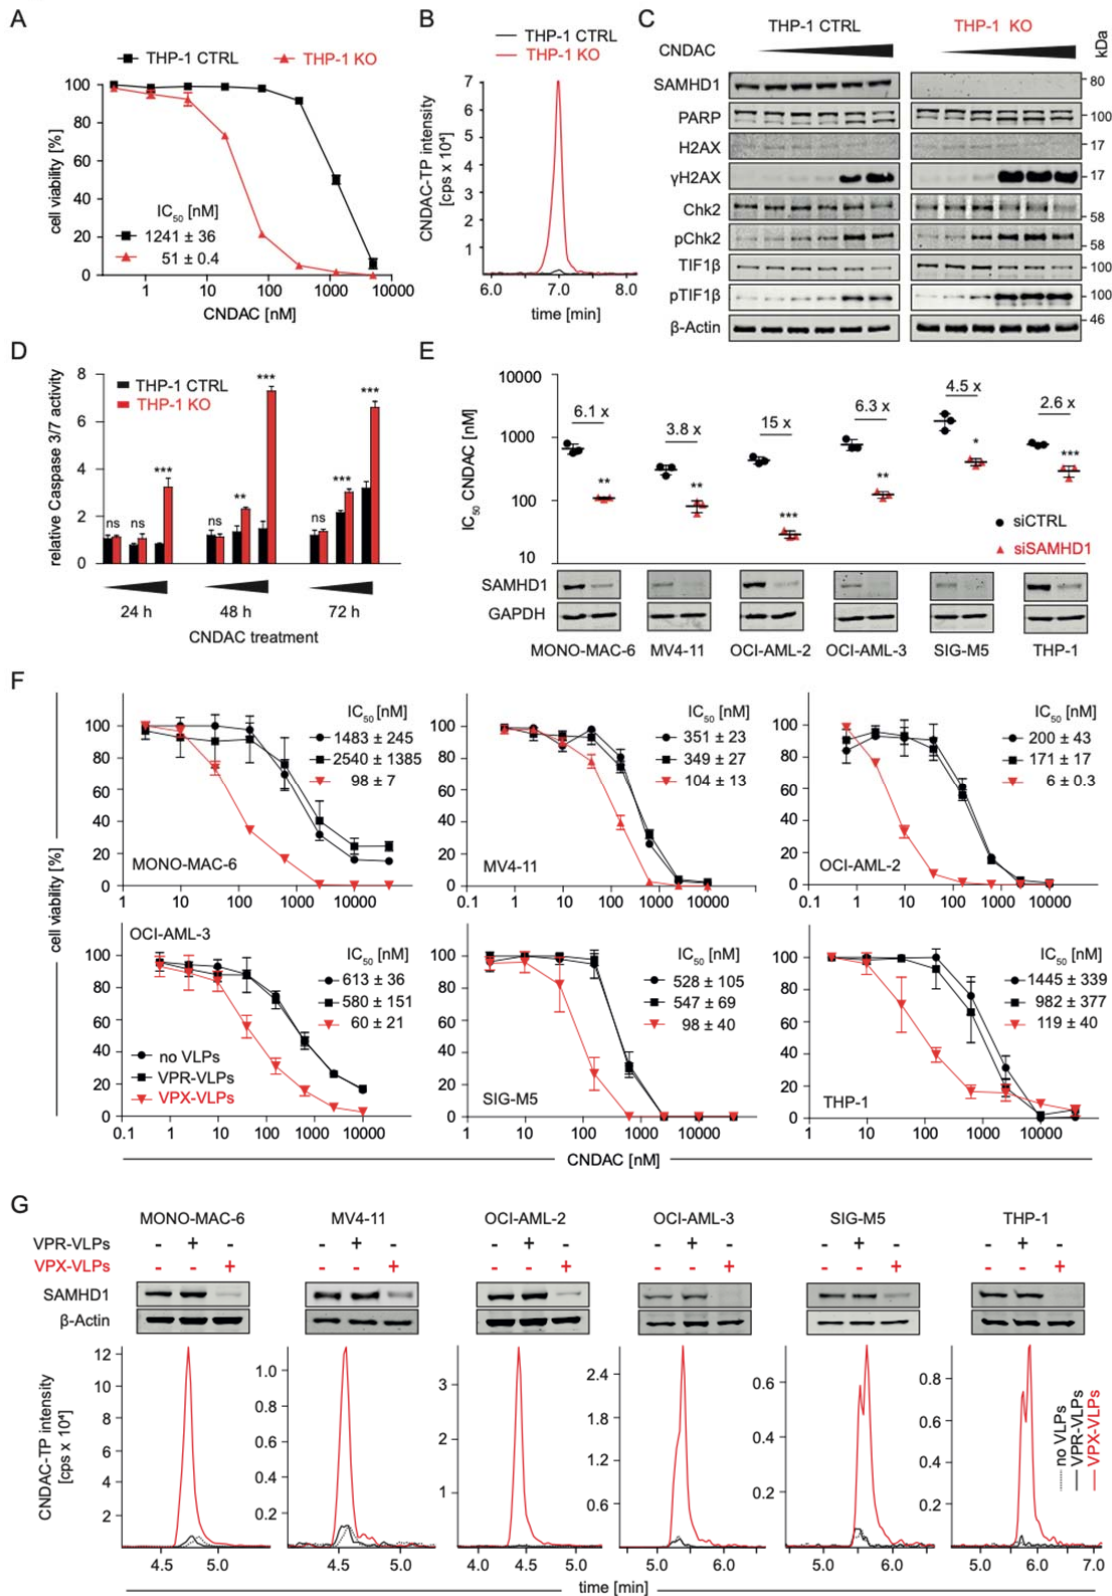

197 **Figure 2. SAMHD1 suppression sensitises AML cells to CNDAC.** (A) CNDAC  
198 dose-response curves in THP-1 knockout (THP-1 KO) cells, in which the *THP-1* gene  
199 was disrupted using CRISPR–Cas9, or control cells (THP-1 CTRL). Values represent  
200 means  $\pm$  SD of three independent experiments. Concentrations that reduce cell  
201 viability by 50% (IC<sub>50s</sub>)  $\pm$  SD are provided. (B) Representative LC-MS/MS analysis of  
202 CNDAC triphosphate (CNDAC-TP) levels in THP-1 KO and THP-1 CTRL cells. (C)  
203 Representative Western blots indicating levels of proteins involved in DNA damage  
204 response in THP-1 KO and THP-1 CTRL cells after treatment with increasing  
205 CNDAC concentrations (0, 3.2, 16, 80, 400, and 2000 nM) for 72 hours. (D) Caspase  
206 3/7 activity in THP-1 KO and THP-1 CTRL cells after treatment with increasing  
207 CNDAC concentrations (0.015, 0.9375 and 60  $\mu$ M) for 24, 48, and 72 hours, relative  
208 to untreated controls. Mean  $\pm$  SD is provided for one representative experiment out of  
209 three using three technical replicates. p-values were determined by two-tailed  
210 Student's t-tests (\*p < 0.05; \*\*p < 0.01; \*\*\*p < 0.001). (E) CNDAC IC<sub>50</sub> values in AML  
211 cells after transfection with SAMHD1-siRNAs (siSAMHD1) or non-targeting control  
212 siRNAs (siCTRL). Values represent the means  $\pm$  SD of three technical replicates of  
213 one representative experiment out of three. p-values were determined by two-tailed  
214 Student's t-tests (\*p < 0.05; \*\*p < 0.01; \*\*\*p < 0.001). (F) CNDAC dose-response  
215 curves in AML cell lines treated with CNDAC in the absence or presence of VPX  
216 virus-like particles (VPX-VLPs, cause SAMHD1 depletion), or VPR virus-like particles  
217 (VPR-VLPs, negative control). Values represent the means  $\pm$  SD of three technical  
218 replicates of one representative experiment out of three. (G) Representative Western  
219 Blots and LC-MS/MS analyses of CNDAC-TP levels in AML cells treated with VPX-  
220 VLPs or control VPR-VLPs.

221

222 **SAMHD1 determines sensitivity of primary AML cells**

223 CNDAC sensitivity also correlated with the cellular SAMHD1 levels in primary  
 224 leukaemic blasts derived from the bone marrow of 24 therapy-naïve AML patients  
 225 (Figure 3A, Suppl. Figure 4, Suppl. Table 4). Moreover, primary leukaemic blasts  
 226 were sensitised by VPX-VLPs to CNDAC (Figure 3B, Figure 3C, Suppl. Figure 5) and  
 227 VPX-VLP-mediated SAMHD1 depletion resulted in increased CNDAC-TP levels in  
 228 AML blasts (Figure 3D, Figure 3E). This shows that SAMHD1 also determines  
 229 CNDAC sensitivity in clinical AML samples.  
 230

**Figure 3**

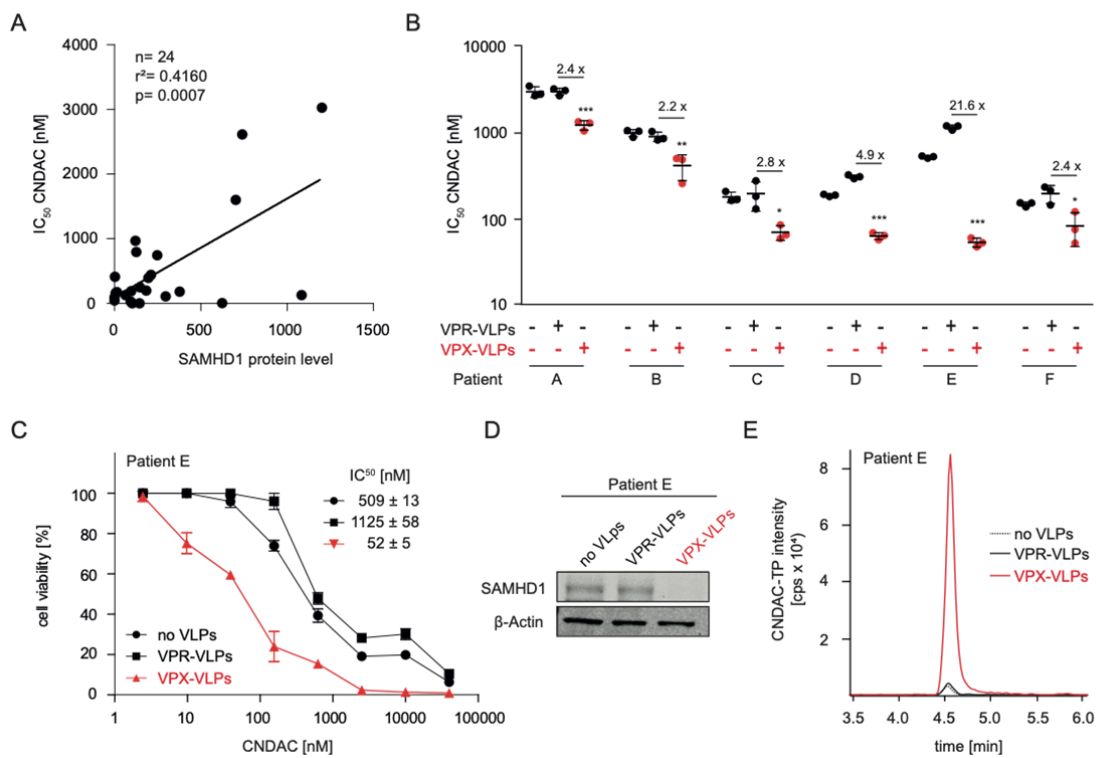

231

232 **Figure 3. SAMHD1 determines CNDAC sensitivity of primary AML cells.** (A)

233 Correlation of SAMHD1 protein levels and CNDAC concentrations that reduce cell  
 234 viability by 50% (IC<sub>50</sub>s) in bone-marrow-derived leukaemic blasts derived from 24  
 235 therapy-naïve AML patients. Cells were co-immunostained for CD33, CD34, CD45  
 236 (surface markers) and intracellular SAMHD1 and the mean fluorescence intensity

237 (MFI) was analysed by flow cytometry. ATP assays were performed in three technical  
238 replicates to determine the CNDAC IC<sub>50</sub> values. Linear regression analyses were  
239 performed using GraphPad Prism. (B) CNDAC IC<sub>50</sub> values in bone-marrow-derived  
240 leukaemic blasts derived from six therapy-naïve AML patients either treated with VPX  
241 virus-like particles (VPX-VLPs, cause SAMHD1 depletion), VPR virus-like particles  
242 (VPR-VLPs, negative control), or left untreated. Horizontal lines and error bars  
243 indicate means ± SD of three technical replicates. p-values were determined by two-  
244 tailed Student's t-tests (\*p < 0.05; \*\*p < 0.01; \*\*\*p < 0.001). (C) CNDAC dose-  
245 response curves in primary AML cells of one exemplary patient (Patient E) treated  
246 with VPX-VLPs, VPR-VLPs or left untreated. IC<sub>50</sub> values represent means ± SD of  
247 three technical replicates. (D) Representative Western blots indicating SAMHD1  
248 levels in primary AML cells derived from Patient E in response to treatment with VPX-  
249 VLPs. (E) CNDAC-triphosphate (CNDAC-TP) levels as determined by LC-MS/MS in  
250 primary AML cells derived from Patient E in response to treatment with VPX-VLPs.

251

252

### 253 ***SAMHD1 hydrolyses CNDAC triphosphate (CNDAC-TP)***

254 Next, we studied the interaction of CNDAC-TP and SAMHD1 in an enzymatic  
255 assay. SAMHD1 forms a homotetramer complex that cleaves nucleoside  
256 triphosphate (Suppl. Figure 6). Tetramer formation depends on nucleoside  
257 triphosphate binding to the allosteric SAMHD1 sites 1 (A1) and A2. A1 is activated by  
258 guanosine triphosphate (GTP) or desoxy-guanosine triphosphate (dGTP) binding. A2  
259 can be activated by any canonical deoxy-nucleoside triphosphate (dNTP) and some  
260 triphosphorylated deoxyribose-based nucleoside analogues such as cladribine-TP  
261 and decitabine-TP (Suppl. Figure 6) [Ji et al., 2013; Ji et al., 2014; Hollenbaugh et al.,  
262 2017; Knecht et al., 2018; Oellerich et al., 2019]. Arabinose-based nucleoside

263 analogue triphosphates (e.g. cytarabine-TP, fludarabine-TP, or arabinosylguanine-TP  
264 (AraG-TP, the active metabolite of nelarabine), and the triphosphorylated 2'-deoxy-2'-  
265 fluororibose-based nucleoside analogue clofarabine depend on the activation of A2  
266 by canonical nucleotides [Hollenbaugh et al., 2017; Knecht et al., 2018; Oellerich et  
267 al., 2019].

268 Results from the enzymatic assay confirmed that SAMHD1 hydrolyses  
269 CNDAC-TP only in the presence of dGTP (Figure 4A). This indicates that CNDAC-TP  
270 is a SAMHD1 substrate but not able to activate the enzyme by binding to A1 and A2.

271

### 272 ***Crystal structure of CNDAC-TP bound to SAMHD1***

273 To investigate the interaction of CNDAC-TP and SAMHD1 further, we  
274 crystallised the catalytically inactive HD domain (residues 113-626; H206R, D207N)  
275 of SAMHD1 in the presence of GTP, dATP, and excess CNDAC-TP as previously  
276 described [Knecht et al., 2018] and collected diffraction data to 2.8Å. SAMHD1  
277 crystallised as a tetramer with GTP and dATP occupying A1 and A2, respectively,  
278 and CNDAC-TP bound to the catalytic site (Figure 4B, Suppl. Table 5).

279 Previous studies investigating the binding of triphosphorylated nucleoside  
280 analogues to SAMHD1 showed that modifications at the 2'ribose (R) position are  
281 major determinants of interaction with the catalytic SAMHD1 site [Knecht et al, 2018].  
282 Analogues with 2'R modifications abrogate binding to SAMHD1, while 2'S  
283 stereoisomers are more permissive. Furthermore, the catalytic site tolerates larger  
284 2'S modifications, whereas analogue binding at the A2 site is either impaired or fully  
285 blocked by 2'S fluorination or hydroxylation of the sugar ring, respectively [Knecht et  
286 al., 2018].

287 Consistent with these observations, the CNDAC-TP-bound SAMHD1 adopts  
288 the same conformation as the canonical nucleotide-bound form (overall RMSD: 0.30

289 Å vs PDB ID 4BZB). The ribose 2'S nitrile modification of CNDAC-TP (Figure 4C)  
290 protrudes outward from the catalytic pocket without affecting canonical nucleotide  
291 contacts with active site residues. CNDAC-TP is therefore easily accommodated in  
292 the catalytic site to serve as a substrate for SAMHD1 triphosphohydrolase activity.  
293 However, the large nitrile group of CNDAC-TP prevents binding to the more  
294 restrictive A2 site. Thus, CNDAC alone is insufficient for SAMHD1 activation.

295

296 ***Impact of CNDAC on cellular levels of physiological nucleoside triphosphates***  
297 ***and the activity of SAMHD1 substrates***

298 The finding that CNDAC-TP is itself a substrate of SAMHD1 does not exclude  
299 the possibility that it also exerts inhibitory effects on SAMHD1, as previously  
300 suggested [Hollenbaugh et al., 2017]. Hence, we investigated the effects of CNDAC  
301 on the levels of physiological desoxynucleoside triphosphates (dNTPs) and the  
302 activity of cytarabine, the triphosphate of which is known to be a SAMHD1 substrate  
303 [Schneider et al., 2017].

304 CNDAC did in contrast to VPX-VLPs, which served as a positive control for  
305 suppressing SAMHD1 activity, not increase the levels of physiological dNTPs (Figure  
306 4D). Moreover, CNDAC did not increase the activity of cytarabine (Figure 4E). Thus,  
307 these findings do not suggest a pharmacologically relevant activity of CNDAC as  
308 SAMHD1 inhibitor in AML cells.

309



**Figure 4**

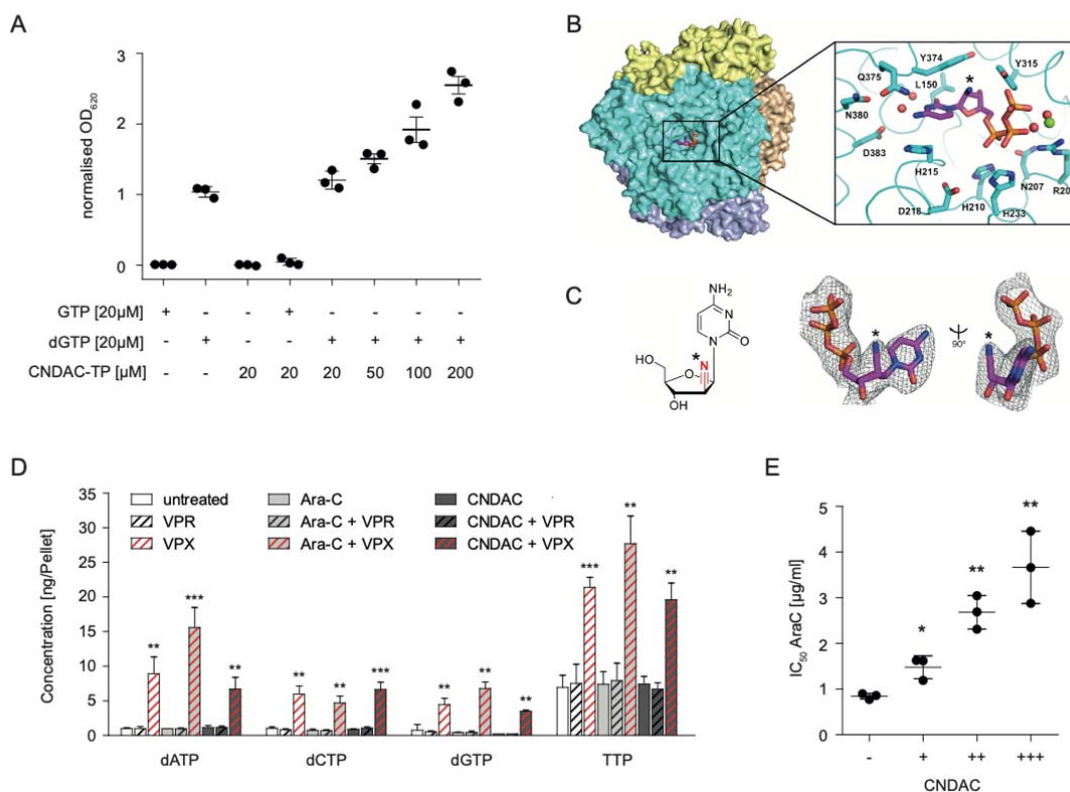

310

311 **Figure 4. CNDAC triphosphate (CNDAC-TP) is a SAMHD1 substrate.** (A)

312 Normalised results from a colorimetric SAMHD1 activity assay carried out in

313 presence of different combinations of GTP, dGTP and CNDAC-TP. Horizontal lines

314 and error bars represent means  $\pm$  SD from three independent experiments. (B)

315 Surface view of SAMHD1 tetramer with each subunit in a different colour. CNDAC-TP

316 in a catalytic pocket is shown in magenta sticks. (B, inset) CNDAC-TP bound to the

317 SAMHD1 catalytic pocket. Black asterisks indicate the site of nitrile modification. The

318 SAMHD1 backbone is shown as ribbons with side chains shown as sticks. A

319 magnesium ion is shown as a green sphere and coordinated waters are shown as

320 red spheres. Portions of the structure are omitted for clarity. (C) Chemical structure of

321 CNDAC with 2'S nitrile modification highlighted (left). 2Fo-Fc electron density ( $\sigma =$

322 1.0) for CNDAC-TP co-crystallized in the catalytic pocket of SAMHD1 (right). Black

323 asterisks indicate site of nitrile modification. (D) Concentrations of physiological

324 dNTPs in THP-1 cells determined by LC-MS/MS after pre-treatment with VPX virus-  
325 like particles (VPX-VLPs, cause SAMHD1 depletion), VPR virus-like particles (VPR-  
326 VLPs, negative control), and with or without cytarabine (AraC) or CNDACs. Bars and  
327 error bars represent means  $\pm$  SD from three independent measurements. The Lower  
328 Limit of Quantification (LLOQ) for dGTP was 0.2 ng/Pellet, so values below the LLOQ  
329 were set to 0.2 ng/Pellet (CNDAC and CNDAC + VPR). p-values were determined by  
330 two-tailed Student's t-tests were performed (\*p < 0.05; \*\*p < 0.01; \*\*\*p < 0.001). (E)  
331 AraC IC<sub>50</sub>s in THP-1 cells in the presence of different CNDAC concentrations (0,  
332 0.375, 0.75, 1.5  $\mu$ M). Horizontal lines and error bars represent means  $\pm$  SD of three  
333 technical replicates of one representative experiment out of three. p-values were  
334 determined by two-tailed Student's t-tests were performed (\*p < 0.05; \*\*p < 0.01; \*\*\*p  
335 < 0.001).

336

### 337 ***Clonal heterogeneity in SAMHD1 levels drives intrinsic AML cell resistance to*** 338 ***CNDAC***

339 When we established twelve single cell-derived clones of the AML cell line  
340 MV4-11 by limited dilution (Figure 5A), we determined an up to 332-fold difference in  
341 CNDAC sensitivity (CNDAC IC<sub>50</sub> clone 1: 0.065  $\mu$ M, CNDAC IC<sub>50</sub> clone 11: 21.6  $\mu$ M;  
342 Figure 5B, Suppl. Figure 7). Moreover, the MV4-11 clones displayed substantial  
343 discrepancies in the cellular SAMHD1 levels (Figure 5C), but no changes in SAMHD1  
344 promoter methylation (Figure 5D).

345 There was a significant correlation between SAMHD1 protein levels (but not  
346 the DCK protein levels) and the CNDAC IC<sub>50</sub>s (Figure 5E), and siRNA-mediated  
347 SAMHD1 depletion resulted in increased CNDAC (but not daunorubicin) sensitivity in  
348 three selected clones displaying differing SAMHD1 levels (Figure 5F, Suppl. Figure  
349 8). The different effects of SAMHD1 on CNDAC- and daunorubicin-mediated toxicity

350 suggest that SAMHD1 interferes with CNDAC activity predominantly by cleaving  
351 CNDAC-TP and not by generally augmenting DNA repair.

352 Differences in cellular SAMHD1 levels may affect cell proliferation [Franzolin et  
353 al., 2013; Kohnken et al., 2015; Kodigepalli et al., 2018; Wu Y et al., 2021], but there  
354 was no significant correlation between the SAMHD1 (or DCK) levels of the MV4-11  
355 clones and their doubling times (Figure 5G).

356 Taken together, these findings confirm that the response to CNDAC is  
357 primarily driven by the SAMHD1 levels in CNDAC-naïve AML cells.

358

**Figure 5**

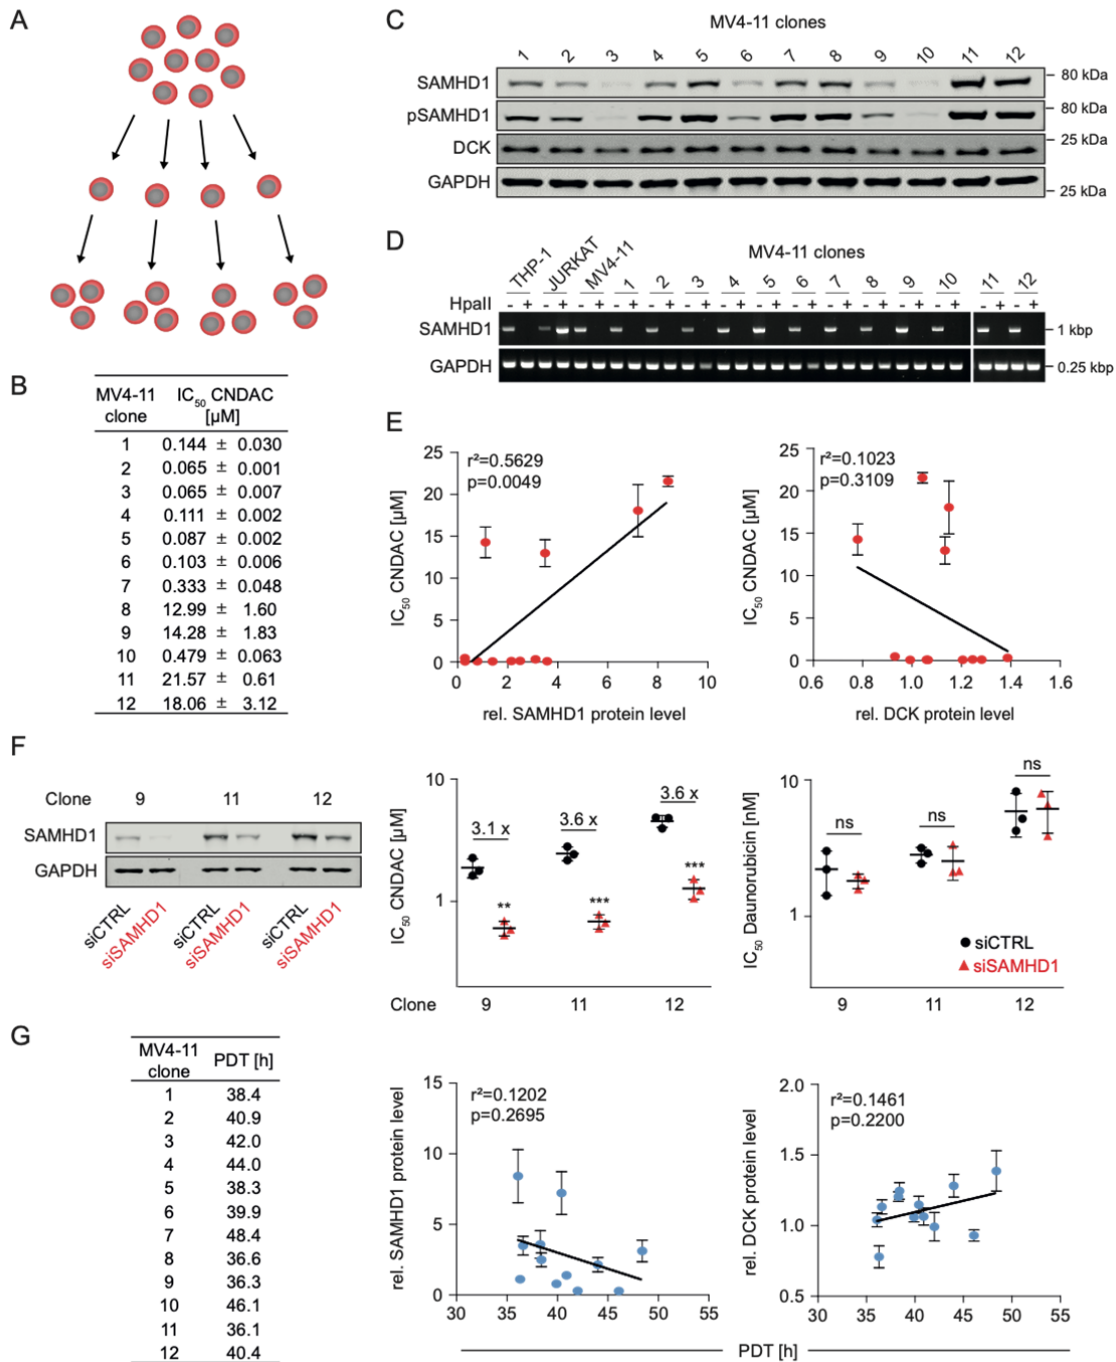

359

360 **Figure 5. Clonal heterogeneity in SAMHD1 levels drives intrinsic resistance to**  
 361 **CNDAC but not population doubling time in MV4-11 cells.** (A) Schematic  
 362 illustration of the establishment of MV4-11 single cell-derived clones by limited  
 363 dilution. (B) CNDAC concentrations that reduce viability of 12 single-cell-derived  
 364 MV4-11 clones by 50% (IC<sub>50</sub>). Values represent means ± SD of three independent

365 experiments. (C) Representative Western blots of SAMHD1, phosphorylated  
366 SAMHD1 (pSAMHD1), and DCK in single cell-derived MV4-11 clones. GAPDH  
367 served as a loading control. (D) Analysis of *SAMHD1* promoter methylation in MV4-  
368 11 clones through amplification of a single PCR product (993-bp) corresponding to  
369 the promoter sequence after *Hpa*II digestion. (E) Correlation of the CNDAC IC<sub>50</sub>  
370 values with cellular SAMHD1 or DCK protein levels, quantified using near-infrared  
371 Western blot images to determine the ratio SAMHD1/ GAPDH or DCK/ GAPDH.  
372 Closed circles and error bars represent means  $\pm$  SD of three independent  
373 experiments, each performed in three technical replicates. Linear regression  
374 analyses were performed using GraphPad Prism. (F) Western Blots and IC<sub>50</sub> values  
375 for CNDAC and Daunorubicin in MV4-11 clones 9, 11, and 12 after transfection with  
376 SAMHD1-siRNAs (siSAMHD1) or non-targeting control siRNAs (siCTRL). Each  
377 symbol represents the mean  $\pm$  SD of three technical replicates of one representative  
378 experiment out of three. P-values were determined by two-tailed Student's t-test (\*p <  
379 0.05; \*\*p < 0.01; \*\*\*p < 0.001). (G) Population doubling time (PDT) in MV4-11 single  
380 cell-derived clones and correlation of the PDT with cellular SAMHD1 or DCK protein  
381 levels. Closed circles and error bars represent means  $\pm$  SD from the quantification of  
382 three Western Blots. Linear regression analyses were performed using GraphPad  
383 Prism.

384

### 385 ***Acquired resistance to CNDAC is associated with decreased DCK levels***

386 To investigate the role of SAMHD1 in acquired CNDAC resistance, we  
387 established twelve CNDAC-resistant sublines of each of the AML cell lines HL60 and  
388 PL21, which are characterised by low SAMHD1 levels (Figure 1A) and high CNDAC  
389 sensitivity (Figure 1B). Interestingly, none of the 24 resulting CNDAC-resistant  
390 sublines displayed increased SAMHD1 levels but all showed reduced, virtually non-

391 detectable DCK levels (Figure 6A). Among twelve single cell-derived clones of HL60  
392 and PL21, none displayed similarly low DCK levels (Figure 6A).

393 Then, we determined resistance profiles in the CNDAC-resistant HL60 and  
394 PL21 sublines and the clonal HL60 and PL21 sublines to a set of cytotoxic (CNDAC,  
395 sapacitabine, cytarabine, clofarabine, cladribine, fludarabine, gemcitabine,  
396 decitabine, azacytidine, 6-thioguanine, daunorubicin) and targeted (venetoclax,  
397 vismodegib, olaparib, ganetespib, volasertib, gedatolisib, molibresib) drugs (Figure  
398 6B, Suppl. Table 6).

399 In addition to resistance to CNDAC and its prodrug sapacitabine, all CNDAC-  
400 adapted sublines also consistently displayed a markedly reduced sensitivity to the  
401 nucleoside analogues clofarabine, cladribine, fludarabine, gemcitabine, and  
402 decitabine, whose activation critically depends on monophosphorylation by DCK  
403 (Figure 6B, Suppl. Table 6). In contrast, there was no cross-resistance to the  
404 nucleoside analogues azacytidine and 6-thioguanine that are no DCK substrates and  
405 to the anthracycline daunorubicin. This suggests that that reduced *DCK* expression is  
406 the predominant acquired resistance mechanism in our panel of CNDAC-adapted  
407 AML cell lines.

408 This notion was also confirmed by the general lack of cross-resistance to  
409 targeted drugs with a range of different targets, including the smoothend receptor  
410 (vismodegib), PARP1 (olaparib), HSP90 (ganetespib), PLK1 (volasertib), and  
411 PI3K/mTOR (gedatolisib). There was some level of resistance to the BET inhibitor  
412 molibresib among the CNDAC-adapted sublines (Figure 6B, Suppl. Table 6).  
413 However, some level of resistance to these drugs was also detected among the  
414 clonal HL60 and PL21 sublines (Figure 6B, Suppl. Table 6), which may suggest that  
415 this molibresib resistance may rather be the consequence of clonal selection

416 processes during resistance formation and not part of the acquired CNDAC  
 417 resistance mechanisms.

418 The Bcl-2 inhibitor venetoclax was the only targeted drug against which the  
 419 CNDAC-adapted sublines displayed an increased level of resistance that was not  
 420 detectable in the clonal sublines (Figure 6B, Suppl. Table 6). This may indicate a  
 421 generally increased resistance to apoptosis in the CNDAC-adapted sublines (Figure  
 422 6B, Suppl. Table 6), which may reflect that apoptosis induction is anticipated to be  
 423 part of the anti-cancer mechanism of action of CNDAC [Liu et al., 2019].

424 Taken together, our findings suggest that DCK downregulation is the major  
 425 acquired CNDAC resistance mechanism in AML cells, potentially complemented by a  
 426 generally reduced potential to undergo apoptosis.

427

Figure 6

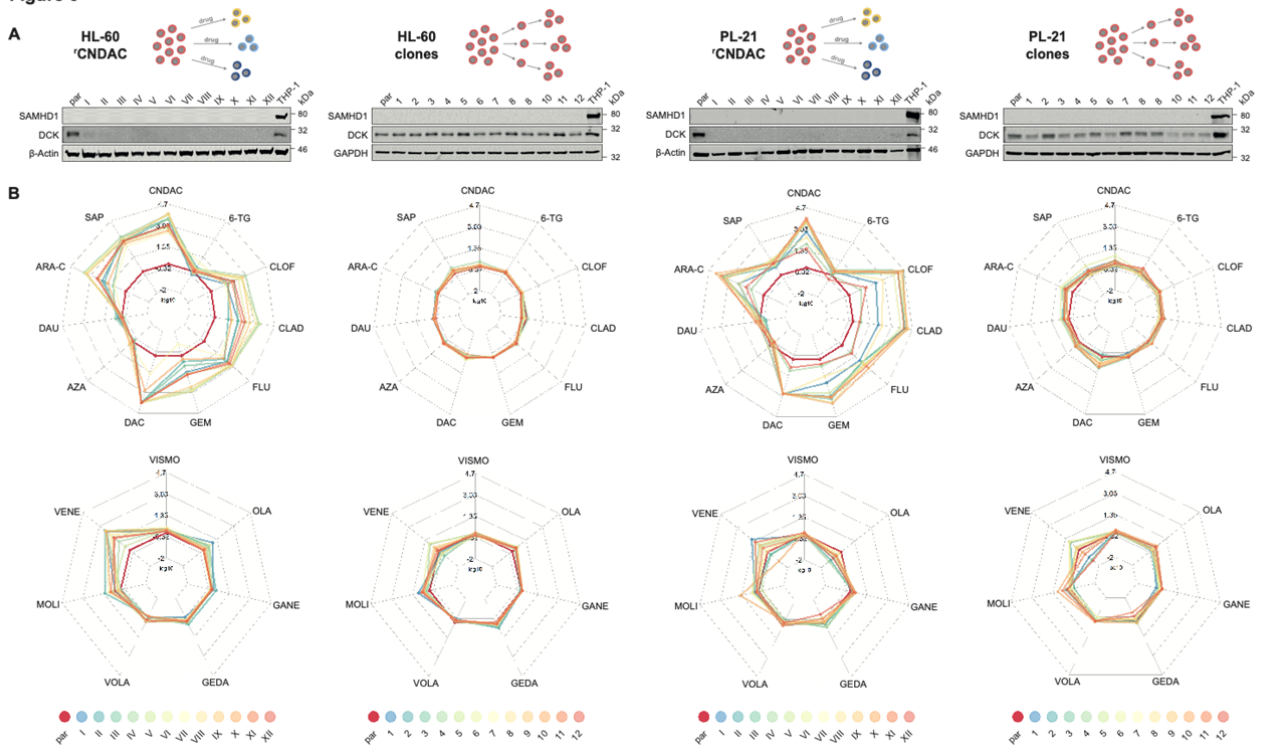

428

429

430 **Figure 6. Acquired resistance to CNDAC is associated with decreased DCK**  
431 **levels and accompanied by cross-resistance to DCK-dependent nucleoside**  
432 **analogues.** (A) Schematic illustrations of the establishment of CNDAC-resistant HL-  
433 60 and PL-21 cells by step-wise increasing drug concentrations during cell culture  
434 and of the establishment of single cell-derived clones by limited dilution. Moreover,  
435 representative Western blots indicating SAMHD1 and DCK levels in CNDAC-adapted  
436 HL-60 (HL-60<sup>r</sup>CNDACI-XII) and PL21 (PL21<sup>r</sup>CNDACI-XII) sublines and in single cell-  
437 derived clonal sublines of these cell lines. GAPDH and  $\beta$ -Actin served as loading  
438 controls. (B) Resistance profiles of CNDAC-adapted HL-60 and PL-21 sublines and  
439 single cell-derived clones of HL-60 and PL-21. Upper spider webs show sensitivity to  
440 the cytotoxic drugs CNDAC, 6-Thioguanine (6-TG), Clofarabine (CLOF), Cladribine  
441 (CLAD), Fludarabine (FLU), Gemcitabine (GEM), Decitabine (DAC), 5-Azacytidine  
442 (AZA), Daunorubicin (DAU), Cytarabine (ARA-C), and Sapacitabine (SAP), while  
443 lower spider webs display sensitivity to the targeted drugs Vismodegib (VISMO),  
444 Olaparib (OLA), Ganetespib (GANE), Gedatolisib (GEDA), Volasertib (VOLA),  
445 Molibresib (MOLI), and Venetoclax (VENE). Values are depicted as fold changes in  
446 drug concentrations that reduce cell viability by 50% ( $IC_{50}$ s) between the respective  
447 parental AML cell line (shown in red) and the resistant cell lines or clones. Points  
448 closer to the centre than red lines indicate higher sensitivity to drugs in CNDAC-  
449 resistant sublines or clonal sublines than in parental cell lines, while points lying  
450 outside red lines indicate reduced sensitivity to the respective drug.  $IC_{50}$  fold changes  
451 are shown as means from three independent experiments. Numerical values are  
452 provided in Supplementary Table 6.

453

454



455 ***Role of SAMHD1 and DCK in CNDAC cross-resistance of AML cell lines***  
456 ***adapted to drugs from different classes***

457 In contrast to the CNDAC-adapted AML cell lines introduced here, which  
458 displayed reduced *DCK* expression as main acquired resistance mechanism, AML  
459 cell lines adapted to the SAMHD1 substrates cytarabine or decitabine were  
460 characterised by a combination of increased SAMHD1 levels and decreased DCK  
461 levels [Schneider et al., 2017; Oellerich et al., 2019].

462 CNDAC-adapted AML sublines displayed pronounced cross-resistance to  
463 nucleoside analogues that are activated by DCK but not to anti-leukaemia drugs with  
464 other mechanisms of action (Figure 6). In a reversed setting, we next investigated  
465 CNDAC in a panel consisting of the AML cell line HL60 and its sublines adapted to  
466 the nucleoside analogues cytarabine, araG, azacytidine, and fludarabine, the purine  
467 antagonist 6-mercaptopurine, the Bcl-2 inhibitor venetoclax, the PARP inhibitor  
468 olaparib, and the polo-like kinase 1 inhibitor volasertib.

469 The nucleoside analogue-resistant HL60 sublines displayed increased  
470 SAMHD1 and/ or decreased DCK levels (Figure 7A) and pronounced CNDAC  
471 resistance (Figure 7B, Suppl. Figure 9), while little or no CNDAC resistance was  
472 detected in the remaining sublines (Figure 7A, Figure 7B, Suppl. Figure 9). Moreover,  
473 cellular SAMHD1 levels directly and cellular DCK levels inversely correlated with the  
474 CNDAC IC<sub>50</sub>s (Figure 7C), indicating that enhanced SAMHD1 levels and reduced  
475 DCK levels contribute to cross-resistance to CNDAC. VPX-VLP-mediated SAMHD1  
476 depletion sensitised nucleoside analogue-adapted HL60 sublines to CNDAC to  
477 various extents (Figure 7D), which probably reflects the relative importance of  
478 SAMHD1 and DCK levels for CNDAC resistance in these cell lines.

479 Next, we used cytarabine-adapted MV4-11 and MOLM13 sublines to further  
480 study the role of SAMHD1 and DCK in cross-resistance of nucleoside analogue-

481 adapted AML cells to CNDAC (Figure 7E). In both cell lines, VPX-VLP-mediated  
 482 SAMHD1 depletion resulted in reduced CNDAC IC<sub>50</sub>s, which further decreased upon  
 483 forced *DCK* expression. Similar findings were obtained with regard to the cytarabine  
 484 resistance in these two cell lines (Figure 7E). This confirms that, in principle, cellular  
 485 SAMHD1 and DCK levels are involved in determining AML cell sensitivity to CNDAC  
 486 (and cytarabine), although, as shown in this study, intrinsic and acquired CNDAC  
 487 resistance differ in AML cells in that intrinsic CNDAC resistance is predominantly  
 488 driven by high SAMHD1 levels and acquired CNDAC resistance by a reduction in  
 489 DCK.  
 490

Figure 7

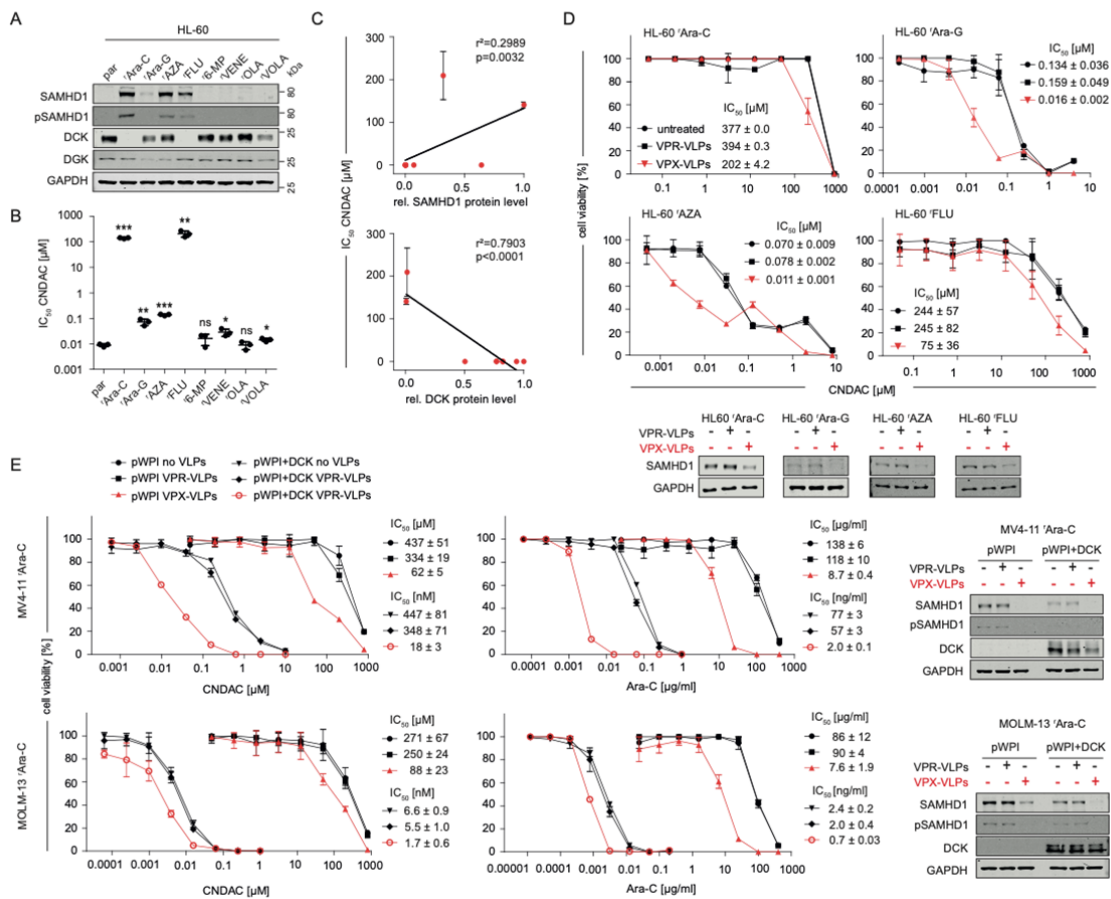

491

492 **Figure 7. SAMHD1 and DCK regulate CNDAC cross-resistance of AML cell lines**

493 **adapted to drugs from different classes. (A) Representative Western blots of**

494 SAMHD1, phosphorylated SAMHD1 (pSAMH1), DGK, and DCK in HL-60 sublines  
495 adapted to cytarabine (Ara-C), arabinosylguanine (Ara-G), 5-azacytidine (AZA),  
496 fludarabine (FLU), 6-mercaptopurine (6-MP), venetoclax (VENE), olaparib (OLA), and  
497 volasertib (VOLA). GAPDH served as loading control. (B) CNDAC concentrations  
498 that reduce cell viability by 50% ( $IC_{50}$ s) in drug-adapted HL-60 sublines. Horizontal  
499 lines and error bars represent means  $\pm$  SD of three independent experiments, each  
500 performed in three technical replicates. p-values were determined by two-tailed  
501 Student's t-tests (\*p < 0.05; \*\*p < 0.01; \*\*\*p < 0.001). (C) Correlation of the CNDAC  
502  $IC_{50}$  values with cellular SAMHD1 or DCK protein levels, quantified using the near-  
503 infrared Western blot image shown in (A) to determine the ratio SAMHD1/ GAPDH or  
504 DCK/ GAPDH. (D) CNDAC dose-response curves in drug-adapted HL-60 sublines in  
505 the absence or presence of VPX virus-like particles (VPX-VLPs, cause SAMHD1  
506 depletion) or VPR virus-like particles (VPR-VLPs, negative control). Each symbol  
507 represents the mean  $\pm$  SD of three technical replicates of one representative  
508 experiment out of three. Concentrations that reduce AML cell viability by 50% ( $IC_{50}$ s)  
509  $\pm$  SD and Western Blots showing SAMHD1 degradation by VPX-VLPs are provided.  
510 (E) CNDAC or cytarabine (Ara-C) dose-response curve in cytarabine-adapted MV4-  
511 11 or MOLM-13 cells (characterised by loss of *DCK* expression) stably transduced  
512 with either DCK (pWpi+DCK) or an empty vector (pWPI) in the absence or presence  
513 of VPX virus-like particles (VPX-VLPs), or VPR virus-like particles (VPR-VLPs). Each  
514 symbol represents the mean  $\pm$  SD of three technical replicates of one representative  
515 experiment out of three.  $IC_{50}$ s (mean  $\pm$  SD) and Western Blots showing successful  
516 transduction with DCK and SAMHD1 degradation by VPX-VLPs are provided.  
517

## 518 **Discussion**

519           The findings of this study indicate that in AML cells intrinsic CNDAC resistance  
520 is predominantly driven by SAMHD1, whereas acquired CNDAC resistance is  
521 primarily caused by reduced DCK levels. This difference is of potential clinical  
522 significance, because SAMHD1 is a candidate biomarker for predicting CNDAC  
523 sensitivity in therapy-naïve patients, while DCK is a candidate biomarker for the early  
524 detection of resistance formation.

525           SAMHD1 is known to interfere with the activity of a range of anti-cancer  
526 nucleoside analogues as hydroxylase that cleaves the activated nucleoside analogue  
527 triphosphates [Schneider et al., 2017; Herold et al., 2017; Knecht et al., 2018;  
528 Oellerich et al., 2019; Rothenburger et al., 2020; Xagorias et al., 2021]. The finding  
529 that SAMHD1 levels critically determine AML (and ALL) cell sensitivity to CNDAC is  
530 nevertheless somewhat unexpected, as CNDAC had originally been suggested to be  
531 a SAMHD1 inhibitor [Hollenbaugh et al., 2017].

532           However, data from a large range of cell line models (including clonal AML  
533 sublines characterised by varying SAMHD1 levels) and patient samples  
534 demonstrated that high SAMHD1 levels are associated with reduced CNDAC  
535 sensitivity and that CRISPR/Cas9-, siRNA-, and VPX-VPL (virus-like particles  
536 carrying the lentiviral VPX protein)-mediated SAMHD1 depletion increase cellular  
537 CNDAC-TP levels and sensitise AML cells to CNDAC. In agreement, enzymatic  
538 assays and crystallisation studies showed that CNDAC-TP is cleaved by SAMHD1,  
539 but can in contrast to some other nucleoside analogues [Ji et al., 2013; Ji et al.,  
540 2014; Hollenbaugh et al., 2017; Knecht et al., 2018; Oellerich et al., 2019] not  
541 activate SAMHD1 via binding to the A2 site.

542           Moreover, the determination of physiological dNTPs in the presence of  
543 CNDAC and combination experiments with the SAMHD1 substrate cytarabine did not

544 provide evidence that CNDAC may function as pharmacological SAMHD1 inhibitor in  
545 leukaemia cells.

546 Although cellular SAMHD1 levels, but not those of DCK that is critical for  
547 CNDAC phosphorylation and activation [Lotfi et al., 2003; Homminga et al., 2011; Wu  
548 et al., 2021], predominantly determined CNDAC sensitivity in CNDAC-naïve cells, the  
549 establishment of 24 CNDAC-resistant AML sublines unanimously resulted in a loss of  
550 DCK but not in an increase of SAMHD1. This differs from acquired resistance  
551 mechanisms against the nucleoside analogues cytarabine and decitabine that were  
552 found to include both increased SAMHD1 levels and decreased DCK levels  
553 [Schneider et al., 2017; Oellerich et al., 2019]. Two previously established CNDAC-  
554 adapted cancer cell lines had been shown to display reduced DCK levels but a  
555 contribution of SAMHD1 had not been investigated [Obata et al., 1998; Obata et al.,  
556 2001].

557 CNDAC-adapted AML sublines consistently displayed cross-resistance to  
558 other nucleoside analogues known to be activated by DCK but no pronounced cross-  
559 resistance to other drugs with various mechanisms of action, further indicating that  
560 loss of DCK is the crucial resistance mechanism in CNDAC-adapted cells. Moreover,  
561 these data also show that drugs, which do not depend on DCK for activation, remain  
562 viable treatment options after resistance acquisition to CNDAC.

563 Similarly, among AML sublines adapted to a range of different anti-cancer  
564 drugs, only nucleoside analogues that displayed increased SAMHD1 and/ or  
565 decreased DCK levels were less sensitive to CNDAC. Thus, acquired resistance to a  
566 range of different anti-leukaemic drugs is unlikely to affect the efficacy of CNDAC.

567 Cytarabine- and decitabine-adapted AML cell lines are characterised by a  
568 combination of increased SAMHD1 levels and/ or reduced DCK levels as  
569 demonstrated previously [Schneider et al., 2017; Oellerich et al., 2019]. Although

570 acquired CNDAC resistance was mediated by decreased DCK levels, both increased  
571 SAMHD1 levels and decreased DCK levels contributed to cross-resistance of  
572 cytarabine-adapted cells to CNDAC. In the future, it will be interesting to investigate  
573 why acquired resistance mechanisms differ between CNDAC-adapted cells on the  
574 one hand and cytarabine- and decitabine-adapted cells on the other hand.

575 In conclusion, intrinsic AML cell response to CNDAC critically depends on  
576 cellular SAMHD1 levels, whereas acquired CNDAC resistance is predominantly  
577 mediated by reduced DCK levels. This adds to data demonstrating differences  
578 between intrinsic and acquired resistance mechanisms [Michaelis et al., 2019;  
579 Oellerich et al., 2019; Santoni-Rugiu et al., 2019; Touat et al., 2020]. These findings  
580 also indicate that SAMHD1 is a candidate biomarker predicting CNDAC response in  
581 the intrinsic resistance setting, while DCK plays a potential role as biomarker  
582 indicating therapy failure early in the acquired resistance setting. Moreover, CNDAC-  
583 adapted cells displayed no or limited cross-resistance to drugs whose activity is not  
584 influenced by DCK or SAMHD1. Similarly, CNDAC was still effective in cells adapted  
585 to drugs that are not affected by DCK or SAMHD1. These findings indicate treatment  
586 options after therapy failure.

587

## 588 **Methods**

### 589 ***Compounds***

590 CNDAC was purchased from biorbyt (via Biozol, Eching, Germany), 5-  
591 azacytidine, cytarabine, cladribine, clofarabine, decitabine, and fludarabine from  
592 Tocris Biosciences (via Bio-Techne GmbH, Wiesbaden, Germany), 6-thioguanine,  
593 ganetespib, molibresib, olaparib, sapacitabine, venetoclax, and vismodegib from  
594 MedChemExpress (via Hycultec, Beutelsbach, Germany), daunorubicin, gedatolisib,  
595 and volasertib from Selleckchem (Berlin, Germany), gemcitabine from Hexal  
596 (Holzkirchen, Germany), GTP and dATP from Thermo Scientific (Dreieich, Germany),  
597 and CNDAC-TP from Jena Bioscience GmbH (Jena, Germany).

### 598 ***Cell culture***

599 The human AML cell lines HEL (DSMZ No. ACC 11), HL-60 (DSMZ No. ACC  
600 3), KG-1 (DSMZ No. ACC 14), ML-2 (DSMZ No. ACC 15), MOLM-13 (DSMZ No.  
601 ACC 554), MONO-MAC-6 (DSMZ No. ACC 124), MV4-11 (DSMZ No. ACC 102), NB-  
602 4 (DSMZ No. ACC 207), OCI-AML-2 (DSMZ No. ACC 99), OCI-AML-3 (DSMZ No.  
603 ACC 582), PL-21 (DSMZ No. ACC 536), SIG-M5 (DSMZ No. ACC 468), and THP-1  
604 (DSMZ No. ACC16) and the human ALL cell lines 697 (DSMZ No. ACC 42), ALL-SIL  
605 (DSMZ No. ACC 511), BALL-1 (DSMZ No. ACC 742), CTV-1 (DSMZ No. ACC 40),  
606 GRANTA-452 (DSMZ No. ACC 713), HAL-01 (DSMZ No. ACC 610), HSB-2 (DSMZ  
607 No. ACC 435), JURKAT (DSMZ No. ACC 282), KE-37 (DSMZ No. ACC 46), MHH-  
608 CALL-4 (DSMZ No. ACC 337), MN-60 (DSMZ No. ACC 138), MOLT-4 (DSMZ No.  
609 ACC 362), MOLT-16 (DSMZ No. ACC 29), NALM-6 (DSMZ No. ACC 128), NALM-16  
610 (DSMZ No. ACC 680), P12-ICHIKAWA (DSMZ No. ACC 34), REH (DSMZ No. ACC  
611 22), ROS-50 (DSMZ No. ACC 557), RPMI-8402 (DSMZ No. ACC 290), RS4;11  
612 (DSMZ No. ACC 508), SEM (DSMZ No. ACC 546), TANOUE (DSMZ No. ACC 399),  
613 and TOM-1 (DSMZ No. ACC 578) were obtained from DSMZ (Deutsche Sammlung

614 von Mikroorganismen und Zellkulturen GmbH, Braunschweig, Germany). The ALL  
615 cell line CCRF-CEM (ATCC No. CCL-119) was received from ATCC (Manassas, VA,  
616 US), the ALL cell line KARPAS231 from Cambridge Enterprise Ltd. (Cambridge, UK),  
617 and the ALL cell line J-JHAN was kindly provided by Professor R. Tedder (University  
618 College London) [Cinatl et al., 1995].

619 Drug-resistant cell sublines were established by continuous exposure of  
620 sensitive parental cell lines HL-60 and PL-21 to step-wise increasing drug  
621 concentrations, as previously described [Michaelis et al., 2011] and are part of the  
622 Resistant Cancer Cell Line (RCCL) collection  
623 (<https://www.kent.ac.uk/stms/cmp/RCCL/RCCLabout.html>) [Michaelis et al., 2019].  
624 Briefly, cells were cultured at increasing drug concentrations, starting with  
625 concentrations that inhibited the viability of the parental cell lines by 50% (IC<sub>50</sub>). Drug  
626 concentrations were increased every 2 to 6 weeks until cells readily grew in the  
627 presence of the drug. In this way 12 independent CNDAC-resistant sublines of HL-60  
628 and PL-21 were generated each and designated as HL-60<sup>r</sup>CNDAC<sup>200nM</sup> I – XII and  
629 PL-21<sup>r</sup>CNDAC<sup>2μM</sup> I-XII. HL-60 cells with acquired resistance to the drugs Cytarabine  
630 (Ara-C), arabinosylguanine (AraG), 5-azacytidine (AZA), fludarabine (FLUDA), 6-  
631 Mercaptopurine (6-MP), venetoclax (VENE), olaparib (OLA), and volasertib (VOLA)  
632 were designated as HL-60<sup>r</sup>AraC<sup>2μg/ml</sup>, HL-60<sup>r</sup>AraG<sup>100μM</sup>, HL-60<sup>r</sup>5-AZA<sup>1μM</sup>, HL-  
633 60<sup>r</sup>FLUDA<sup>1μg/ml</sup>, HL-60<sup>r</sup>6-MP<sup>2μM</sup>, HL-60<sup>r</sup>VENE<sup>2μM</sup>, HL-60<sup>r</sup>OLA<sup>20μM</sup> and HL-  
634 60<sup>r</sup>VOLA<sup>200nM</sup>.

635 Clonal sublines were generated by limiting dilution. Cells were plated at a  
636 density of 1 cell per well on a 96-well plate and grown for 1 - 2 weeks. Wells with only  
637 one visible cell colony were identified and the respective clones were expanded.

638 SAMHD1-deficient THP-1 (THP-1 KO) cells and control cells (THP-1 CTRL)  
639 were generated using CRISPR/Cas9 approach as previously described [Wittmann et



640 al., 2015; Schneider et al., 2017; Oellerich et al., 2019]. THP-1 cells were plated at a  
641 density of  $2 \times 10^5$  cells/ mL. After 24h,  $2.5 \times 10^6$  cells were suspended in 250 $\mu$ l Opti-  
642 MEM, mixed with 5 $\mu$ g CRISPR/Cas plasmid DNA, and electroporated in a 4-mm  
643 cuvette using an exponential pulse at 250 V and 950 mF in a Gene Pulser  
644 electroporation device (Bio-Rad Laboratories, Feldkirchen, Germany). We used a  
645 plasmid encoding a CMV-mCherry-Cas9 expression cassette and a human SAMHD1  
646 gene specific gRNA driven by the U6 promoter. An early coding exon of the SAMHD1  
647 gene was targeted using the following gRNA construct: 5'-  
648 CGGAAGGGGTGTTTGAGGGG-3'. Cells were allowed to recover for 2 days in 6-  
649 well plates filled with 4 ml medium per well before being FACS sorted for mCherry-  
650 expression on a BD FACS Aria III (BD Biosciences, Heidelberg, Germany). For  
651 subsequent limiting dilution cloning, cells were plated at a density of 5, 10, or 20 cells  
652 per well of nine round-bottom 96-well plates and grown for 2 weeks. Plates were  
653 scanned for absorption at 600 nm and growing clones were identified using custom  
654 software and picked and duplicated by a Biomek FXp (Beckman Coulter, Krefeld,  
655 Germany) liquid handling system.

656 DCK-expressing MV4-11rAraC<sup>2 $\mu$ g/ml</sup> and MOLM-13rAraC<sup>2 $\mu$ g/ml</sup> cells were  
657 established by lentiviral transduction and designated as MV4-11rAraC<sup>2 $\mu$ g/ml</sup>-  
658 pWPI+DCK and MOLM-13rAraC<sup>2 $\mu$ g/ml</sup>-pWPI+DCK (or MV4-11rAraC<sup>2 $\mu$ g/ml</sup>-pWPI and  
659 MOLM-13rAraC<sup>2 $\mu$ g/ml</sup>-pWPI for control cells transduced with the empty vector). To  
660 generate the pWPI+DCK plasmid, the dCK gene was PCR-amplified from pDNR-  
661 Dual\_dCK (DNAsu HsCD00000962) using Pfu DNA polymerase (Promega,  
662 Germany) and gene-specific primers (Eurofins Genomics, Germany) and subcloned  
663 into pWPI IRES puro via BamHI/SpeI. The plasmid was verified by Sanger  
664 sequencing (Eurofins Genomics, Germany). For the generation of lentiviral vectors  
665 293T cells were co-transfected with pWPI+DCK (or pWPI as control), Addgene

666 packaging plasmid pPAX, an envelope plasmid encoding VSV-G and pAdVantage  
667 (Promega). Four days after transfection, lentiviral vectors were harvested and  
668 concentrated by ultracentrifugation. For lentiviral transduction MV4-11rAraC<sup>2µg/ml</sup> and  
669 MOLM-13rAraC<sup>2µg/ml</sup> cells were seeded at 5 x 10<sup>5</sup> cells/ well of a 96-well-plate and  
670 spinoculated with the lentiviral vectors. 24 hours after transduction, successfully  
671 transduced cells were selected with 3 µg/ml puromycin (Sigma-Aldrich) and DCK  
672 expression was monitored by Western Blot.

673 All cell lines were cultured in IMDM (Biochrom, Cambridge, UK) supplemented  
674 with 10% FBS (SIG-M5 20% FBS, Sigma-Aldrich, Taufkirchen, Germany), 4 mM L-  
675 Glutamine (Sigma-Aldrich), 100 IU/ml penicillin (Sigma-Aldrich), and 100 mg/ml  
676 streptomycin (Sigma-Aldrich) at 37°C in a humidified 5% CO<sub>2</sub> incubator. Cell lines  
677 were routinely tested for Mycoplasma, using the MycoAlert PLUS assay kit from  
678 Lonza (Basel, Switzerland), and were authenticated by short tandem repeat profiling.  
679

### 680 ***Primary AML samples***

681 Peripheral blood or bone marrow samples derived from AML patients between  
682 2018 and 2020 were obtained from the UCT Biobank of the University Hospital  
683 Frankfurt. The use of peripheral blood and bone marrow aspirates was approved by  
684 the Ethics Committee of Frankfurt University Hospital (approval no. SHN-03-2017).  
685 All patients gave informed consent to the collection of samples and to the scientific  
686 analysis of their data and of biomaterial obtained for diagnostic purposes according  
687 to the Declaration of Helsinki.

688 Mononuclear cell (MNC) fractions were purified by gradient centrifugation with  
689 Biocoll cell separation solution (Merck Millipore, Darmstadt, Germany). Leukemic  
690 cells were enriched by negative selection with a combination of CD3-, CD19- and  
691 CD235a-microbeads (all obtained from Miltenyi Biotec, Bergisch Gladbach,

692 Germany, 130-050-301, 130-050-101, 130-050-501) according to the manufacturer's  
693 instructions and separated by the autoMACS™ Pro Separator (Miltenyi Biotec).  
694 FACS staining and treatment for viability assays of AML blasts was executed  
695 immediately after isolation. Culture medium for AML blasts consisted of IMDM  
696 (Biochrom) supplemented with 10% FBS, 4 mM L-glutamine, 25 ng/ml hTPO, 50  
697 ng/ml hSCF, 50 ng/ml hFlt3-Ligand and 20 ng/ml hIL-3 (all obtained from Miltenyi  
698 Biotec, 130-094-013, 130-096-695, 130-096-479, 130-095-069).

699

### 700 **Viability assay**

701 The viability of AML and ALL cell lines treated with various drug  
702 concentrations was determined by 3-(4,5-dimethylthiazol-2-yl)-2,5-  
703 diphenyltetrazolium bromide (MTT) assay modified after Mosman [Mosmann, 1983],  
704 as previously described [Onafuye et al., 2019]. Cells suspended in 100 µL cell culture  
705 medium were plated per well in 96-well plates and incubated in the presence of  
706 various drug concentrations for 96 h. Then, 25 µL of MTT solution (2 mg/mL (w/v) in  
707 PBS) were added per well, and the plates were incubated at 37 °C for an additional  
708 4 h. After this, the cells were lysed using 100 µL of a buffer containing 20% (w/v)  
709 sodium dodecylsulfate in 50% (v/v) N,N-dimethylformamide with the pH adjusted to  
710 4.7 at 37 °C for 4 h. Absorbance was determined at 570 nm for each well using a 96-  
711 well multiscanner (Tecan Spark, Tecan, Crailsheim, Germany). After subtracting of  
712 the background absorption, the results are expressed as percentage viability relative  
713 to control cultures which received no drug. Drug concentrations that inhibited cell  
714 viability by 50% (IC<sub>50</sub>) were determined using CalcuSyn (Biosoft, Cambridge, UK) or  
715 GraphPad Prism (San Diego, CA, USA).

716 For AML blasts viability assays were performed using the CellTiter-Glo  
717 (Promega, Walldorf, Germany) assay according to the manufacturer's protocol.

718 Briefly, cells were seeded at 5,000 cells per well in 96-well plates and treated for 96  
719 hours. Luminescence was measured on a Tecan Spark (Tecan). IC<sub>50</sub> values were  
720 calculated using GraphPad Prism.

721

### 722 ***Caspase 3/7 assay***

723 To determine Caspase 3/7 activity in THP-1 SAMHD1 KO and CTRL cells the  
724 Caspase-Glo 3/7 assay (Promega, Walldorf, Germany) was used according to the  
725 manufacturer's protocol. Briefly, cells were seeded at 5,000 cells per well in white 96-  
726 well plates, treated with different concentrations of CNDAC and incubated for 24, 48  
727 and 72 hours at 37°C in a humidified 5% CO<sub>2</sub> incubator. After incubation an equal  
728 volume of Caspase-Glo 3/7 reagent was added, mixed for 30 minutes and  
729 luminescence was measured on a Tecan Spark (Tecan).

730

### 731 ***Determination of Population doubling time (PDT)***

732 To generate a growth curve, cells were seeded at 2,000 cells per well in a  
733 white 96-well plate in 100µl culture medium and incubated for 0, 1, 2, 3, 4 and 7 days  
734 at 37°C in a humidified 5% CO<sub>2</sub> incubator. Cell viability was detected using the  
735 CellTiter-Glo assay (Promega) according to the manufacturer's protocol. Growth  
736 curves were created and the population doubling times calculated using the following  
737 formula:

$$\text{PDT} = \frac{\text{cultivation period [h]} \times \log_{10}(2)}{\log_{10}(\text{final cell count}) - \log_{10}(\text{starting cell count})}$$

738

### 739 ***Western blot analysis***

740 Whole-cell lysates were prepared by using Triton-X sample buffer containing  
741 protease inhibitor cocktail from Roche (Grenzach-Wyhlen, Germany). The protein

742 concentration was assessed by using the DC Protein assay reagent obtained from  
743 Bio-Rad Laboratories. Equal protein loads were separated by sodium dodecyl  
744 sulfate-polyacrylamide gel electrophoresis and proteins were transferred to  
745 nitrocellulose membranes (Thermo Scientific, Dreieich, Germany). The following  
746 primary antibodies were used at the indicated dilutions: SAMHD1 (Proteintech, St.  
747 Leon-Roth, Germany, 12586-1-AP, 1:1000),  $\beta$ -actin (BioVision, Milpitas, CA, US,  
748 3598R-100, 1:5000), pSAMHD1 (Cell Signaling, Frankfurt am Main, Germany,  
749 89930S, 1:1000), and GAPDH (Trevigen via Bio-Techne, Wiesbaden, Germany,  
750 2275-PC-10C, 1:5000), DCK (abcam, Berlin, Germany, ab96599, 1:4000), DGK  
751 (Santa Cruz Biotechnology, Heidelberg, Germany, sc-398093, 1:100), PARP (Cell  
752 Signaling, 9542S, 1:1000), H2AX (Cell Signaling, 2595S, 1:1000),  $\gamma$ H2AX (Cell  
753 Signaling, 9718S, 1:1000), Chk2 (Cell Signaling, 2662S, 1:1000), pChk2 (Cell  
754 Signaling, 2661S, 1:1000), TIF-1 $\beta$  (Cell Signaling, 4124S, 1:1000), pTIF-1 $\beta$  (Cell  
755 Signaling, 4127S, 1:1000). Visualisation and quantification were performed using  
756 IRDye-labeled secondary antibodies (LI-COR Biotechnology, Bad Homburg,  
757 Germany, IRDye®800CW Goat anti-Rabbit, 926-32211 and IRDye®800CW Goat  
758 anti-Mouse IgG, 926-32210) according to the manufacturer's instructions. Band  
759 volume analysis was conducted by Odyssey LICOR.

760

### 761 ***Flow Cytometry***

762 The intracellular SAMHD1 staining of AML blasts was performed as previously  
763 described [Baldauf et al., 2012] with SAMHD1-antibody from Proteintech (12586-1-  
764 AP, 1:100). Staining for surface markers (CD33, CD34, CD45) for AML blasts was  
765 applied before fixation with the following fluorochrome-conjugated antibodies: CD33-  
766 PE and CD34-FITC, both from Miltenyi Biotech (130-111-019, 130-113-178) and  
767 CD45-V450 from BD Pharmingen (Heidelberg, Germany, 642275), all diluted 1:5 per

768  $1 \times 10^7$  cells, and goat anti-rabbit Alexa-Fluor-660 from Invitrogen, Life technologies  
769 (1:200, A-21073) as secondary antibody for SAMHD1 staining. Samples were  
770 analysed by using a FACSVerse flow cytometer from BD Biosciences (Heidelberg,  
771 Germany) and the FlowJo software (FlowJo LLC, Ashland, OR, US). To determine  
772 the mean fluorescence intensity (MFI) for SAMHD1, the geometric mean for the  
773 isotype control was subtracted from the geometric mean for SAMHD1.

774

### 775 ***SAMHD1 promoter methylation***

776 The *SAMHD1* promoter contains five *HpaII* sites surrounding the transcription  
777 start site [de Silva et al., 2013]. To measure methylation of the *SAMHD1* promoter  
778 genomic DNA was treated with the methylation-sensitive *HpaII* endonuclease as  
779 described previously [de Silva et al., 2013; Oellerich et al., 2019]. Methylation of  
780 the *HpaII* sites in the *SAMHD1* promoter prevents digestion by *HpaII* and the intact  
781 sequence serves then as a template for PCR amplification using *SAMHD1* promoter-  
782 specific primers that flank the *HpaII* sites: PM3.fwd: TTCCGCCTCATTCGTCCTTG  
783 and PM3.rev: GGTTCTCGGGCTGTCATCG were used as *SAMHD1* promoter-  
784 specific primers. A single PCR product (993-bp) corresponding to  
785 the *SAMHD1* promoter sequence was obtained from untreated genomic DNA and  
786 treated DNA from cells with methylated but not from cells with  
787 unmethylated *SAMHD1* promoter. To serve as input control, a 0.25-kb fragment of  
788 the *GAPDH* gene lacking *HpaII* sites was PCR-amplified using the same template  
789 DNA.

790

### 791 ***Manipulation of cellular SAMHD1 levels using siRNA or Vpx-VLPs***

792 For siRNA-mediated silencing, AML blasts ( $1 \times 10^6$ ) were transfected with 2.5  
793  $\mu\text{M}$  ON-TARGET plus human SAMHD1 siRNA SMART-pool obtained from

794 Dharmacon (Munich, Germany, L-013950-01-0050) in resuspension electroporation  
795 buffer R (Invitrogen, Dreieich, Germany) using the Neon transfection system  
796 (Invitrogen) according to the manufacturer's recommendation. Additionally, ON-  
797 TARGET plus Non-targeting Control Pool obtained from Dharmacon (D-001810-10-  
798 50) was transfected in parallel. The electroporation was performed with one 20 msec  
799 pulse of 1700 V and analysed 48 h after transfection by western blotting and a cell  
800 viability assay.

801 For Vpx virus-like particle (VLP)-mediated SAMHD1 degradation, cells were  
802 spinoculated with VSV-G pseudotyped virus-like particles carrying either Vpx or Vpr  
803 as control from SIVmac251. VLPs carrying Vpx or Vpr were produced by co-  
804 transfection of 293T cells with pSIV3 + *gag pol* expression plasmids and a plasmid  
805 encoding VSV-G as previously described [Schneider et al., 2017; Oellerich et al.,  
806 2019]. For viability assays cells were preincubated with VLPs for 24 h before the  
807 studied compounds were added.

808

### 809 ***LC-MS/MS Analysis***

810 AML or ALL cells were seeded at  $2,5 \times 10^5$  cells per well in 24 well plates,  
811 treated with 10 $\mu$ M CNDAC and incubated at 37°C in a humidified 5% CO<sub>2</sub> incubator  
812 for 6 h. Subsequently, cells were washed twice in 1 ml PBS, pelleted and stored at -  
813 80°C until measurement. The concentrations of canonical dNTPs and CNDAC-  
814 triphosphate in the samples were analysed by liquid chromatography-electrospray  
815 ionization-tandem mass spectrometry, as previously described for canonical dNTPs  
816 [Thomas et al., 2015]. Briefly, the analytes were extracted by protein precipitation  
817 with methanol. An anion-exchange HPLC column (BioBasic AX, 150 x 2.1 mm, 5  $\mu$ M,  
818 Thermo Scientific) was used for the chromatographic separation and a 5500 QTrap  
819 (Sciex, Darmstadt, Germany) was used as analyser, operating as triple quadrupole in

820 positive multiple reaction monitoring (MRM) mode. CNDAC-TP was quantified using  
821 2-deoxycytidine-<sup>13</sup>C<sub>9</sub>, <sup>15</sup>N<sub>3</sub>-triphosphate (<sup>13</sup>C<sub>9</sub>, <sup>15</sup>N<sub>3</sub>-dCTP) as internal standard (IS).  
822 The precursor-to-product ion transition used as quantifier was m/z 493.1 → 112.1 for  
823 CNDAC-TP. Owing to the lack of commercially available standards for CNDAC-TP,  
824 relative quantification was performed by comparing the peak area ratios (analyte/IS)  
825 of the differently treated samples.

826

### 827 ***Protein Expression and Purification***

828 N-terminal 6×His-tagged SAMHD1 (residues 113 to 626, H206R D207N) was  
829 expressed in BL21 (DE3) Escherichia coli grown in Terrific Broth medium at 200 rpm,  
830 18° C for 16 hr. Cells were re-suspended in buffer and passed through a  
831 microfluidizer. Cleared lysates were purified using nickel-nitrilotriacetic acid (Ni-NTA)  
832 affinity and size-exclusion chromatography. Proteins were stored in a buffer  
833 containing 50 mM Tris-HCl, pH 8, 150 mM NaCl, 0.5 mM TCEP, 5 mM MgCl<sub>2</sub>, and  
834 10% glycerol.

835

### 836 ***Crystallization and Data Collection***

837 Purified SAMHD1 protein in buffer (50 mM Tris-HCl, pH 8.0, 150 mM NaCl, 5  
838 mM MgCl<sub>2</sub>, and 0.5 mM TCEP) was mixed with 1 mM GTP, 0.1 mM dATP, and 10  
839 mM CNDAC. All crystals were grown at 25 °C using the microbatch under-oil method  
840 by mixing 1 μL of protein (3 mg/mL) with 1 μL of crystallization buffer (100 mM  
841 succinate–phosphate–glycine (SPG) buffer, pH 7.4, 25% PEG 1500; Qiagen).  
842 Crystals were improved by streak seeding. Crystals were cryoprotected in paratone  
843 oil and frozen in liquid nitrogen. Diffraction data were collected at Advanced Photon  
844 Source beamline 24-ID-E. The data statistics are summarized in Table 1.

845



## 846 ***Structure Determination and Refinement***

847 Using the previously published SAMHD1 tetramer structure (PDB ID code  
848 4BZB), with the bound nucleotides removed, as the search model, the structure was  
849 solved by molecular replacement using PHASER [Vagin & Teplyakov, 2000; McCoy  
850 et al., 2007; Winn et al., 2011]. The model was refined with iterative rounds of  
851 restrained refinement using Refmac5 [Murshudov et al., 1997], followed by rebuilding  
852 the model to the 2Fo-Fc and the Fo-Fc maps using Coot [Emsley et al., 2010].  
853 Refinement statistics are summarised in Suppl. Table 5. Coordinates and structure  
854 factors have been deposited in the Protein Data Bank, with accession codes listed in  
855 Suppl. Table 5.

856

## 857 ***Enzymatic assay***

858 In vitro SAMHD1 activity was measured as described [Seamon & Stivers,  
859 2015]. Briefly, 1 $\mu$ M his-tagged human SAMHD1 and 1.5 $\mu$ M PPase from E.coli were  
860 incubated at room temperature in 20 $\mu$ L reaction buffer (50mM Tris, 150mM NaCl,  
861 1.25mM MgCl<sub>2</sub>, 0.5mM TCEP, 0.05% Brij-35) and different concentrations of GTP,  
862 dGTP and CNDAC-TP in a clear 384-well plate (Corning, 3700, New York, USA).  
863 Reactions were stopped by addition of 20 $\mu$ L EDTA (20mM in water). Subsequently,  
864 10 $\mu$ L malachite green reagent (Sigma-Aldrich, MAK307, Missouri, USA) were added.  
865 Absorbance was recorded at 620nm after incubating the samples for 60min at room  
866 temperature. For normalization, background subtraction of controls containing the  
867 same substrate and PPase concentrations but no SAMHD1 was performed.

868

869

870 **Statistics**

871           Statistical data analysis was performed using GraphPad Prism. Pearson's  
872 correlation coefficient was used to compute correlations between variables, using a t-  
873 test to assess significance of the correlation. Group comparisons were performed  
874 using Student's t-test.

875

876 **Declarations**

877 ***Ethics approval and consent to participate***

878 The use of peripheral blood and bone marrow aspirates was approved by the Ethics  
879 Committee of Frankfurt University Hospital (approval no. SHN-03-2017). All patients  
880 gave informed consent to the collection of samples and to the scientific analysis of  
881 their data and of biomaterial obtained for diagnostic purposes according to the  
882 Declaration of Helsinki.

883 ***Consent for publication***

884 Not applicable.

885 ***Availability of data and materials***

886 The atomic coordinates and structure factors have been deposited in the Protein  
887 Data Bank, [www.wwpdb.org](http://www.wwpdb.org). The PDB ID code will be added upon publication. The  
888 Preliminary Full wwPDB X-ray Structure Validation Report is provided as supplement.

889 ***Competing interests***

890 The authors declare that they have no competing interests.

891 ***Funding***

892 The study was supported by the Frankfurter Stiftung für krebskranke Kinder and the  
893 Hilfe für krebskranke Kinder Frankfurt e.V.

894 ***Authors' contributions***

895 TR, DT, YS, PRW, TP, KK, KD, JT, CS, HB, KM, FR, BB, SF, DB, RC, NF, MNW,  
896 and JC performed experiments. All authors analysed data. JC and MM  
897 conceptualised and directed the study. TR, JC, and MM wrote the initial manuscript  
898 draft. All authors read and approved the final manuscript.

899 ***Acknowledgements***

900 Not applicable.

901

902

903

904 **References**

- 905 Al Abo M, Sasanuma H, Liu X, Rajapakse VN, Huang SY, Kiselev E, Takeda S,  
906 Plunkett W, Pommier Y. TDP1 is Critical for the Repair of DNA Breaks Induced by  
907 Sapacitabine, a Nucleoside also Targeting ATM- and BRCA-Deficient Tumors. *Mol*  
908 *Cancer Ther.* 2017 Nov;16(11):2543-2551. doi: 10.1158/1535-7163.MCT-17-0110.
- 909 Azuma A, Huang P, Matsuda A, Plunkett W. 2'-C-cyano-2'-deoxy-1-beta-D-arabino-  
910 pentofuranosylcytosine: a novel anticancer nucleoside analog that causes both DNA  
911 strand breaks and G(2) arrest. *Mol Pharmacol.* 2001 Apr;59(4):725-31. doi:  
912 10.1124/mol.59.4.725.
- 913 Baldauf HM, Pan X, Erikson E, Schmidt S, Daddacha W, Burggraf M, Schenkova K,  
914 Ambiel I, Wabnitz G, Gramberg T, Panitz S, Flory E, Landau NR, Sertel S, Rutsch F,  
915 Lasitschka F, Kim B, König R, Fackler OT, Keppler OT. SAMHD1 restricts HIV-1  
916 infection in resting CD4(+) T cells. *Nat Med.* 2012 Nov;18(11):1682-7. doi:  
917 10.1038/nm.2964.
- 918 Bukowski K, Kciuk M, Kontek R. Mechanisms of Multidrug Resistance in Cancer  
919 Chemotherapy. *Int J Mol Sci.* 2020 May 2;21(9):3233. doi: 10.3390/ijms21093233.
- 920 Cinatl J Jr, Cinatl J, Weber B, Rabenau H, Gumbel HO, Kornhuber B, Doerr HW.  
921 Replication of human herpesvirus type 6 (strain AJ) in JJHan cells grown in protein-  
922 free medium. *Res Virol.* 1995 Mar-Apr;146(2):125-9. doi: 10.1016/0923-  
923 2516(96)81081-8.
- 924 Czemerska M, Robak T, Wierzbowska A. The efficacy of sapacitabine in treating  
925 patients with acute myeloid leukemia. *Expert Opin Pharmacother.* 2018  
926 Nov;19(16):1835-1839. doi: 10.1080/14656566.2018.1524875.

927 de Silva S, Hoy H, Hake TS, Wong HK, Porcu P, Wu L. Promoter methylation  
928 regulates SAMHD1 gene expression in human CD4+ T cells. *J Biol Chem*. 2013 Mar  
929 29;288(13):9284-92. doi: 10.1074/jbc.M112.447201.

930 Emsley P, Lohkamp B, Scott WG, Cowtan K. Features and development of Coot.  
931 *Acta Crystallogr D Biol Crystallogr*. 2010 Apr;66(Pt 4):486-501. doi:  
932 10.1107/S0907444910007493.

933 Fenton TR, Garrett MD, Wass MN, Michaelis M. What really matters - response and  
934 resistance in cancer therapy. *Cancer Drug Resist* 2018;1:200-3.

935 Franzolin E, Pontarin G, Rampazzo C, Miazzi C, Ferraro P, Palumbo E, Reichard P,  
936 Bianchi V. The deoxynucleotide triphosphohydrolase SAMHD1 is a major regulator of  
937 DNA precursor pools in mammalian cells. *Proc Natl Acad Sci U S A*. 2013 Aug  
938 27;110(35):14272-7. doi: 10.1073/pnas.1312033110.

939 Goldstone DC, Ennis-Adeniran V, Hedden JJ, Groom HC, Rice GI, Christodoulou E,  
940 Walker PA, Kelly G, Haire LF, Yap MW, de Carvalho LP, Stoye JP, Crow YJ, Taylor  
941 IA, Webb M. HIV-1 restriction factor SAMHD1 is a deoxynucleoside triphosphate  
942 triphosphohydrolase. *Nature*. 2011 Nov 6;480(7377):379-82. doi:  
943 10.1038/nature10623.

944 Hanaoka K, Suzuki M, Kobayashi T, Tanzawa F, Tanaka K, Shibayama T, Miura S,  
945 Ikeda T, Iwabuchi H, Nakagawa A, Mitsunashi Y, Hisaoka M, Kaneko M, Tomida A,  
946 Wataya Y, Nomura T, Sasaki T, Matsuda A, Tsuruo T, Kurakata S. Antitumor activity  
947 and novel DNA-self-strand-breaking mechanism of CNDAC (1-(2-C-cyano-2-deoxy-  
948 beta-D-arabino-pentofuranosyl) cytosine) and its N4-palmitoyl derivative (CS-682). *Int*  
949 *J Cancer*. 1999 Jul 19;82(2):226-36. doi: 10.1002/(sici)1097-  
950 0215(19990719)82:2<226::aid-ijc13>3.0.co;2-x.

951 Herold N, Rudd SG, Sanjiv K, Kutzner J, Bladh J, Paulin CBJ, Helleday T, Henter JI,  
952 Schaller T. SAMHD1 protects cancer cells from various nucleoside-based

953 antimetabolites. *Cell Cycle*. 2017 Jun 3;16(11):1029-1038. doi:  
954 10.1080/15384101.2017.1314407.

955 Hollenbaugh JA, Shelton J, Tao S, Amiralaie S, Liu P, Lu X, Goetze RW, Zhou L,  
956 Nettles JH, Schinazi RF, Kim B. Substrates and Inhibitors of SAMHD1. *PLoS One*.  
957 2017 Jan 3;12(1):e0169052. doi: 10.1371/journal.pone.0169052.

958 Homminga I, Zwaan CM, Manz CY, Parker C, Bantia S, Smits WK, Higginbotham F,  
959 Pieters R, Meijerink JP. In vitro efficacy of forodesine and nelarabine (ara-G) in  
960 pediatric leukemia. *Blood*. 2011 Aug 25;118(8):2184-90. doi: 10.1182/blood-2011-02-  
961 337840.

962 Ji X, Wu Y, Yan J, Mehrens J, Yang H, DeLucia M, Hao C, Gronenborn AM,  
963 Skowronski J, Ahn J, Xiong Y. Mechanism of allosteric activation of SAMHD1 by  
964 dGTP. *Nat Struct Mol Biol*. 2013 Nov;20(11):1304-9. doi: 10.1038/nsmb.2692.

965 Ji X, Tang C, Zhao Q, Wang W, Xiong Y. Structural basis of cellular dNTP regulation  
966 by SAMHD1. *Proc Natl Acad Sci U S A*. 2014 Oct 14;111(41):E4305-14. doi:  
967 10.1073/pnas.1412289111.

968 Kantarjian H, Garcia-Manero G, O'Brien S, Faderl S, Ravandi F, Westwood R, Green  
969 SR, Chiao JH, Boone PA, Cortes J, Plunkett W. Phase I clinical and pharmacokinetic  
970 study of oral sapacitabine in patients with acute leukemia and myelodysplastic  
971 syndrome. *J Clin Oncol*. 2010 Jan 10;28(2):285-91. doi: 10.1200/JCO.2009.25.0209.

972 Kantarjian H, Faderl S, Garcia-Manero G, Luger S, Venugopal P, Maness L, Wetzler  
973 M, Coutre S, Stock W, Claxton D, Goldberg SL, Arellano M, Strickland SA, Seiter K,  
974 Schiller G, Jabbour E, Chiao J, Plunkett W. Oral sapacitabine for the treatment of  
975 acute myeloid leukaemia in elderly patients: a randomised phase 2 study. *Lancet*  
976 *Oncol*. 2012 Nov;13(11):1096-104. doi: 10.1016/S1470-2045(12)70436-9.

977 Kantarjian HM, Jabbour EJ, Garcia-Manero G, Kadia TM, DiNardo CD, Daver NG,  
978 Borthakur G, Jain N, Waukau JB, Kwari MI, Ravandi F, Anderson BD, Iizuka K, Jin C,

979 Zhang C, Plunkett WK. Phase 1/2 study of DFP-10917 administered by continuous  
980 intravenous infusion in patients with recurrent or refractory acute myeloid leukemia.  
981 *Cancer*. 2019 May 15;125(10):1665-1673. doi: 10.1002/cncr.31923.

982 Knecht KM, Buzovetsky O, Schneider C, Thomas D, Srikanth V, Kaderali L,  
983 Tofoleanu F, Reiss K, Ferreirós N, Geisslinger G, Batista VS, Ji X, Cinatl J Jr,  
984 Keppler OT, Xiong Y. The structural basis for cancer drug interactions with the  
985 catalytic and allosteric sites of SAMHD1. *Proc Natl Acad Sci U S A*. 2018 Oct  
986 23;115(43):E10022-E10031. doi: 10.1073/pnas.1805593115.

987 Kodigepalli KM, Bonifati S, Tirumuru N, Wu L. SAMHD1 modulates in vitro  
988 proliferation of acute myeloid leukemia-derived THP-1 cells through the PI3K-Akt-p27  
989 axis. *Cell Cycle*. 2018;17(9):1124-1137. doi: 10.1080/15384101.2018.1480218.

990 Kohnken R, Kodigepalli KM, Wu L. Regulation of deoxynucleotide metabolism in  
991 cancer: novel mechanisms and therapeutic implications. *Mol Cancer*. 2015 Sep  
992 29;14:176. doi: 10.1186/s12943-015-0446-6.

993 Liu X, Guo Y, Li Y, Jiang Y, Chubb S, Azuma A, Huang P, Matsuda A, Hittelman W,  
994 Plunkett W. Molecular basis for G2 arrest induced by 2'-C-cyano-2'-deoxy-1-beta-D-  
995 arabino-pentofuranosylcytosine and consequences of checkpoint abrogation. *Cancer*  
996 *Res*. 2005 Aug 1;65(15):6874-81. doi: 10.1158/0008-5472.CAN-05-0288.

997 Liu X, Matsuda A, Plunkett W. Ataxia-telangiectasia and Rad3-related and DNA-  
998 dependent protein kinase cooperate in G2 checkpoint activation by the DNA strand-  
999 breaking nucleoside analogue 2'-C-cyano-2'-deoxy-1-beta-D-arabino-  
1000 pentofuranosylcytosine. *Mol Cancer Ther*. 2008 Jan;7(1):133-42. doi: 10.1158/1535-  
1001 7163.MCT-07-0416.

1002 Liu X, Jiang Y, Nowak B, Qiang B, Cheng N, Chen Y, Plunkett W. Targeting  
1003 BRCA1/2 deficient ovarian cancer with CNDAC-based drug combinations. *Cancer*  
1004 *Chemother Pharmacol*. 2018 Feb;81(2):255-267. doi: 10.1007/s00280-017-3483-6.



1005 Liu X, Jiang Y, Takata KI, Nowak B, Liu C, Wood RD, Hittelman WN, Plunkett W.  
1006 CNDAC-Induced DNA Double-Strand Breaks Cause Aberrant Mitosis Prior to Cell  
1007 Death. *Mol Cancer Ther.* 2019 Dec;18(12):2283-2295. doi: 10.1158/1535-7163.MCT-  
1008 18-1380.

1009 Lotfi K, Juliusson G, Albertioni F. Pharmacological basis for cladribine resistance.  
1010 *Leuk Lymphoma.* 2003 Oct;44(10):1705-12. doi: 10.1080/1042819031000099698.

1011 McCoy AJ, Grosse-Kunstleve RW, Adams PD, Winn MD, Storoni LC, Read RJ.  
1012 Phaser crystallographic software. *J Appl Crystallogr.* 2007 Aug 1;40(Pt 4):658-674.  
1013 doi: 10.1107/S0021889807021206.

1014 Michaelis M, Rothweiler F, Barth S, Cinatl J, van Rikxoort M, Löschmann N, Voges Y,  
1015 Breitling R, von Deimling A, Rödel F, Weber K, Fehse B, Mack E, Stiewe T, Doerr  
1016 HW, Speidel D, Cinatl J Jr. Adaptation of cancer cells from different entities to the  
1017 MDM2 inhibitor nutlin-3 results in the emergence of p53-mutated multi-drug-resistant  
1018 cancer cells. *Cell Death Dis.* 2011 Dec 15;2(12):e243. doi: 10.1038/cddis.2011.129.

1019 Michaelis M, Wass MN, Cinatl J Jr. Drug-adapted cancer cell lines as preclinical  
1020 models of acquired resistance. *Cancer Drug Resist* 2019;2:447-456. doi:  
1021 10.20517/cdr.2019.005.

1022 Mosmann T. Rapid colorimetric assay for cellular growth and survival: application to  
1023 proliferation and cytotoxicity assays. *J Immunol Methods.* 1983 Dec 16;65(1-2):55-  
1024 63. doi: 10.1016/0022-1759(83)90303-4.

1025 Murshudov GN, Vagin AA, Dodson EJ. Refinement of macromolecular structures by  
1026 the maximum-likelihood method. *Acta Crystallogr D Biol Crystallogr.* 1997 May  
1027 1;53(Pt 3):240-55. doi: 10.1107/S09074444996012255.

1028 Obata T, Endo Y, Tanaka M, Matsuda A, Sasaki T. Development and biochemical  
1029 characterization of a 2'-C-cyano-2'-deoxy-1-beta-D-arabino-pentofuranosylcytosine

1030 (CNDAC)-resistant variant of the human fibrosarcoma cell line HT-1080. *Cancer Lett.*  
1031 1998 Jan 16;123(1):53-61. doi: 10.1016/s0304-3835(97)00402-3.

1032 Obata T, Endo Y, Tanaka M, Uchida H, Matsuda A, Sasaki T. Deletion mutants of  
1033 human deoxycytidine kinase mRNA in cells resistant to antitumor cytosine  
1034 nucleosides. *Jpn J Cancer Res.* 2001 Jul;92(7):793-8. doi: 10.1111/j.1349-  
1035 7006.2001.tb01163.x.

1036 Oellerich T, Schneider C, Thomas D, Knecht KM, Buzovetsky O, Kaderali L,  
1037 Schliemann C, Bohnenberger H, Angenendt L, Hartmann W, Wardelmann E,  
1038 Rothenburger T, Mohr S, Scheich S, Comoglio F, Wilke A, Ströbel P, Serve H,  
1039 Michaelis M, Ferreirós N, Geisslinger G, Xiong Y, Keppler OT, Cinatl J Jr. Selective  
1040 inactivation of hypomethylating agents by SAMHD1 provides a rationale for  
1041 therapeutic stratification in AML. *Nat Commun.* 2019 Aug 2;10(1):3475. doi:  
1042 10.1038/s41467-019-11413-4.

1043 Onafuye H, Pieper S, Mulac D, Cinatl J Jr, Wass MN, Langer K, Michaelis M.  
1044 Doxorubicin-loaded human serum albumin nanoparticles overcome transporter-  
1045 mediated drug resistance in drug-adapted cancer cells. *Beilstein J Nanotechnol.*  
1046 2019 Aug 14;10:1707-1715. doi: 10.3762/bjnano.10.166.

1047 Powell RD, Holland PJ, Hollis T, Perrino FW. Aicardi-Goutieres syndrome gene and  
1048 HIV-1 restriction factor SAMHD1 is a dGTP-regulated deoxynucleotide  
1049 triphosphohydrolase. *J Biol Chem.* 2011 Dec 23;286(51):43596-600. doi:  
1050 10.1074/jbc.C111.317628.

1051 Rothenburger T, McLaughlin KM, Herold T, Schneider C, Oellerich T, Rothweiler F,  
1052 Feber A, Fenton TR, Wass MN, Keppler OT, Michaelis M, Cinatl J Jr. SAMHD1 is a  
1053 key regulator of the lineage-specific response of acute lymphoblastic leukaemias to  
1054 nelarabine. *Commun Biol.* 2020 Jun 24;3(1):324. doi: 10.1038/s42003-020-1052-8.

1055 Santoni-Rugiu E, Melchior LC, Urbanska EM, Jakobsen JN, Stricker K, Grauslund M,  
1056 Sørensen JB. Intrinsic resistance to EGFR-Tyrosine Kinase Inhibitors in EGFR-  
1057 Mutant Non-Small Cell Lung Cancer: Differences and Similarities with Acquired  
1058 Resistance. *Cancers (Basel)*. 2019 Jul 1;11(7):923. doi: 10.3390/cancers11070923.

1059 Schneider C, Oellerich T, Baldauf HM, Schwarz SM, Thomas D, Flick R,  
1060 Bohnenberger H, Kaderali L, Stegmann L, Cremer A, Martin M, Lohmeyer J,  
1061 Michaelis M, Hornung V, Schliemann C, Berdel WE, Hartmann W, Wardelmann E,  
1062 Comoglio F, Hansmann ML, Yakunin AF, Geisslinger G, Ströbel P, Ferreirós N,  
1063 Serve H, Keppler OT, Cinatl J Jr. SAMHD1 is a biomarker for cytarabine response  
1064 and a therapeutic target in acute myeloid leukemia. *Nat Med*. 2017 Feb;23(2):250-  
1065 255. doi: 10.1038/nm.4255.

1066 Seamon KJ, Stivers JT. A High-Throughput Enzyme-Coupled Assay for SAMHD1  
1067 dNTPase. *J Biomol Screen*. 2015 Jul;20(6):801-9. doi: 10.1177/1087057115575150.

1068 Thomas D, Herold N, Keppler OT, Geisslinger G, Ferreirós N. Quantitation of  
1069 endogenous nucleoside triphosphates and nucleosides in human cells by liquid  
1070 chromatography tandem mass spectrometry. *Anal Bioanal Chem*. 2015  
1071 May;407(13):3693-704. doi: 10.1007/s00216-015-8588-3.

1072 Touat M, Li YY, Boynton AN, Spurr LF, Iorgulescu JB, Bohrson CL, Cortes-Ciriano I,  
1073 Birzu C, Geduldig JE, Pelton K, Lim-Fat MJ, Pal S, Ferrer-Luna R, Ramkissoon SH,  
1074 Dubois F, Bellamy C, Currimjee N, Bonardi J, Qian K, Ho P, Malinowski S, Taquet L,  
1075 Jones RE, Shetty A, Chow KH, Sharaf R, Pavlick D, Albacker LA, Younan N, Baldini  
1076 C, Verreault M, Giry M, Guillerm E, Ammari S, Beuvon F, Mokhtari K, Alentorn A,  
1077 Dehais C, Houillier C, Laigle-Donadey F, Psimaras D, Lee EQ, Nayak L, McFaline-  
1078 Figueroa JR, Carpentier A, Cornu P, Capelle L, Mathon B, Barnholtz-Sloan JS,  
1079 Chakravarti A, Bi WL, Chiocca EA, Fehnel KP, Alexandrescu S, Chi SN, Haas-Kogan  
1080 D, Batchelor TT, Frampton GM, Alexander BM, Huang RY, Ligon AH, Coulet F,

1081 Delattre JY, Hoang-Xuan K, Meredith DM, Santagata S, Duval A, Sanson M,  
1082 Cherniack AD, Wen PY, Reardon DA, Marabelle A, Park PJ, Idbaih A, Beroukhim R,  
1083 Bandopadhyay P, Bielle F, Ligon KL. Mechanisms and therapeutic implications of  
1084 hypermutation in gliomas. *Nature*. 2020 Apr;580(7804):517-523.

1085 Vagin A, Teplyakov A. An approach to multi-copy search in molecular replacement.  
1086 *Acta Crystallogr D Biol Crystallogr*. 2000 Dec;56(Pt 12):1622-4. doi:  
1087 10.1107/s0907444900013780.

1088 Winn MD, Ballard CC, Cowtan KD, Dodson EJ, Emsley P, Evans PR, Keegan RM,  
1089 Krissinel EB, Leslie AG, McCoy A, McNicholas SJ, Murshudov GN, Pannu NS,  
1090 Potterton EA, Powell HR, Read RJ, Vagin A, Wilson KS. Overview of the CCP4 suite  
1091 and current developments. *Acta Crystallogr D Biol Crystallogr*. 2011 Apr;67(Pt  
1092 4):235-42. doi: 10.1107/S0907444910045749.

1093 Wittmann S, Behrendt R, Eissmann K, Volkmann B, Thomas D, Ebert T, Cribier A,  
1094 Benkirane M, Hornung V, Bouzas NF, Gramberg T. Phosphorylation of murine  
1095 SAMHD1 regulates its antiretroviral activity. *Retrovirology*. 2015 Dec 15;12:103. doi:  
1096 10.1186/s12977-015-0229-6.

1097 Wu B, Mao ZJ, Wang Z, Wu P, Huang H, Zhao W, Zhang L, Zhang Z, Yin H, Gale  
1098 RP, Yin B. Deoxycytidine Kinase (DCK) Mutations in Human Acute Myeloid  
1099 Leukemia Resistant to Cytarabine. *Acta Haematol*. 2021 Feb 24:1-8. doi:  
1100 10.1159/000513696.

1101 Wu Y, Niu Y, Wu Y, Chen X, Shen X, Gao W. SAMHD1 can suppress lung  
1102 adenocarcinoma progression through the negative regulation of STING. *J Thorac  
1103 Dis*. 2021 Jan;13(1):189-201. doi: 10.21037/jtd-20-1889.

1104 Xagoraris I, Vassilakopoulos TP, Drakos E, Angelopoulou MK, Panitsas F, Herold N,  
1105 Medeiros LJ, Giakoumis X, Pangalis GA, Rassidakis GZ. Expression of the novel  
1106 tumour suppressor sterile alpha motif and HD domain-containing protein 1 is an

1107 independent adverse prognostic factor in classical Hodgkin lymphoma. Br J  
1108 Haematol. 2021 Feb 2. doi: 10.1111/bjh.17352.
